1 **Title: A constitutively expressed fluorescence ubiquitin cell cycle indicator**  
2 **(FUCCI) in axolotls for studying tissue regeneration**

3

4 **Authors:** Timothy J Duerr<sup>1</sup>, Eun Kyung Jeon<sup>1</sup>, Kaylee M Wells<sup>2</sup>, Antonio Villanueva<sup>1</sup>,  
5 Ashley W Seifert<sup>3</sup>, Catherine D McCusker<sup>2</sup>, James R Monaghan<sup>1\*</sup>

6

7 **Affiliations**

8 <sup>1</sup>Northeastern University, Department of Biology, Boston, MA

9 <sup>2</sup>University of Massachusetts Boston, Department of Biology, Boston, MA

10 <sup>3</sup>University of Kentucky, Department of Biology, Lexington, KY

11

12 **Correspondence**

13 \*James Monaghan, Northeastern University, 360 Huntington Avenue Boston, MA 02115

14 Email: [j.monaghan@northeastern.edu](mailto:j.monaghan@northeastern.edu)

15 Phone:(617)-373-3725

16

17 **Summary statement**

18 We generated a ubiquitous transgenic fluorescence ubiquitin cell cycle indicator

19 (FUCCI) axolotl line for examination of cell cycle dynamics during tissue regeneration.

20 **Keywords:** Regeneration, FUCCI, cell cycle, axolotl

21 **Abstract:**

22 Regulation of cell cycle progression is essential for cell proliferation during regeneration  
23 following injury. After appendage amputation, the axolotl (*Ambystoma mexicanum*)  
24 regenerates missing structures through an accumulation of proliferating cells known as  
25 the blastema. To study cell division during blastema growth, we generated a transgenic  
26 line of axolotls that ubiquitously expresses a bicistronic version of the Fluorescent  
27 Ubiquitination-based Cell Cycle Indicator (FUCCI). We demonstrate near-ubiquitous  
28 expression of FUCCI expression in developing and adult tissues and validate these  
29 expression patterns with DNA synthesis and mitosis phase markers. We demonstrate  
30 the utility of FUCCI for live and whole-mount imaging, showing the predominantly local  
31 contribution of cells during limb and tail regeneration. We also show that spinal cord  
32 amputation results in increased proliferation at least 5 mm from the injury. Finally, we  
33 use multimodal staining to provide cell type information for cycling cells by combining  
34 fluorescence *in-situ* hybridization, EdU click-chemistry, and immunohistochemistry on a  
35 single FUCCI tissue section. This new line of animals will be useful for studying cell  
36 cycle dynamics using *in-situ* endpoint assays and *in-vivo* imaging in developing and  
37 regenerating animals.

38 **Introduction:**

39

40 Vertebrate tissue regeneration inherently requires cell proliferation either through  
41 endogenous stem cell proliferation or re-entry of differentiated cells into the cell cycle.  
42 One of the most striking examples of vertebrate regeneration is epimorphic replacement  
43 of the amputated salamander appendage. Appendage regeneration requires the  
44 generation of a highly proliferative mass of cells called the blastema. The formation of  
45 the blastema is dependent on an intact nerve supply and a specialized layer of  
46 epithelium known as the apical epithelial cap (AEC) (McCusker et al., 2015a). The AEC  
47 likely has multiple functions including directing outgrowth, maintaining proliferation, and  
48 secreting factors that allow for remodeling of underlying extracellular matrix (Stocum,  
49 2017; Tsai et al., 2020). Although the blastema consists of numerous cell types, most  
50 cells originate from mesenchymal cell populations located near the amputation plane  
51 (Butler, 1933; McHedlishvili et al., 2007). Understanding the mechanisms that initiate  
52 and sustain proliferation of blastema cells is a fundamental problem that requires  
53 modern molecular tools to track and characterize blastema cell behavior (Stocum, 2017;  
54 Tanaka, 2016). Although recent developments in transgenesis and tissue grafting  
55 techniques has allowed the observation of blastema cells *in vivo* (Currie et al., 2016;  
56 Khattak et al., 2013; Kragl and Tanaka, 2009; Sandoval-Guzmán et al., 2014), further  
57 development of transgenic lines are needed to enable imaging of the regeneration  
58 process.

59

60 In 2008, Sakaue-Sawano and colleagues developed the fluorescent, ubiquitination-  
61 based cell cycle indicator (FUCCI) system to study cell cycle progression in human cell  
62 lines and mice (Sakaue-Sawano et al., 2008). Since then several variations have been  
63 made to the FUCCI construct, and it has been used to generate additional transgenic  
64 plants (Yin et al., 2014) and animals (Abe et al., 2013; Sugiyama et al., 2009; Zielke et  
65 al., 2014). The FUCCI system is based upon the inverse oscillation of Geminin and  
66 Cdt1 proteins that occurs naturally during the cell cycle (Nishitani et al., 2004). The  
67 FUCCI construct includes a constitutively active promoter driving expression of a  
68 fluorescent protein fused to the Cdt1 protein degron, which has high levels in G1 due to

69 ubiquitin-mediated proteolysis during S, G2 and early mitotic phases (S/G2/M).  
70 Conversely, the Geminin protein degron is fused to a different fluorescent molecule that  
71 is degraded during late M and G1, leading to high fluorescent protein levels in  
72 S/G2/early M ((Zielke and Edgar, 2015) for review). Fusion of these two expression  
73 cassettes into a single bicistronic transgene allows visualization of cells while they  
74 progress through the cell cycle.

75  
76 In this study, we use a ubiquitously expressed bicistronic FUCCI construct to generate a  
77 transgenic line of axolotl salamanders to study cell cycle dynamics during development,  
78 limb regeneration, and tail regeneration.

79

## 80 **Results:**

### 81 **Generation and characterization of developing FUCCI axolotls**

82

83 We chose to design a bicistronic version of the original FUCCI construct because it  
84 should theoretically lead to equimolar levels of probes and only require the generation  
85 of a single transgenic animal line (Rajan et al., 2018). The construct includes a CAG  
86 promoter that drives expression of monomeric azami green fused to the zebrafish  
87 geminin degron (mAG-zGem) followed by a viral 2A self-cleaving peptide and mCherry  
88 fused to the zebrafish Cdt1 degron (mCherry-zCdt1), which was cloned into the pISce-  
89 Dest backbone (gift of Jochen Wittbrodt) using Gateway cloning (Fig. 1A). F0 animals  
90 were generated using standard axolotl injection conditions with I-SceI Meganuclease  
91 (Khattak et al., 2009), generating F0 animals with mosaic FUCCI expression. A single  
92 female was selected due to strong ubiquitous FUCCI expression (Fig. 1B) to mate with  
93 a d/d white male, which generated clutches consisting of 82% and 92.7% transmission  
94 rate suggesting the FUCCI construct integrated at multiple sites in the founder animal.

95

96 Examining live transgenic embryos, we first detected FUCCI protein expression at  
97 neurulation with increasing expression throughout development (Fig. 1C-D). Expression  
98 was variable between siblings, possibly due to varying levels of transcriptional activation  
99 or due to multiple integrations of the FUCCI construct into the genome (Fig. 1D-F).



100 Gross observation of transgenic larvae clearly showed distinct non-proliferative G1  
101 populations including the somites (Fig. 1D-F), the tail myotomes (Fig. 1G), lateral line  
102 neuromasts (Fig. 1G), and highly proliferative S/G2/M populations such as the limb bud  
103 and larval heart (Fig. 1H). To determine the adult expression pattern of CAG-FUCCI,  
104 tissues sections were analyzed from the brain, eye, heart, liver, spleen, and gut. mAG  
105 and mCherry expression were observed in every tissue type with little overlap between  
106 probes except for differentiated muscle fibers (Fig. 1I-N, Fig. S1).

107

### 108 **FUCCI cell cycling probes overlap with S and M phase markers**

109

110 To determine the overall expression level of FUCCI, we quantified 2547 cells in fixed  
111 regenerating FUCCI spinal cords sections 14 days post amputation (dpa) pulsed with 5-  
112 ethynyldeoxyuridine (EdU) for three hours (n=9 animals). In total, 22.34% of the cells  
113 were mAG<sup>+</sup>/mCherry<sup>-</sup>, 71.22% were mAG<sup>-</sup>/mCherry<sup>+</sup>, 2.75% were mAG<sup>+</sup>/mCherry<sup>+</sup>, and  
114 3.69% mAG<sup>-</sup>/mCherry<sup>-</sup> (Fig. S2A). We next determined whether mAG<sup>+</sup> cells were  
115 specific to S phase by performing click-it based EdU detection of DNA synthesis on the  
116 same regenerating spinal cord tissues (Fig. 2A). Of the 532 EdU<sup>+</sup> cells (20.9% of total  
117 cells), 88.93% were mAG<sup>+</sup>/mCherry<sup>-</sup>, 3.00% were mAG<sup>+</sup>/mCherry<sup>+</sup>, 1.88% were mAG<sup>-</sup>  
118 /mCherry<sup>+</sup>, and 6.19% were mAG<sup>-</sup>/mCherry<sup>-</sup> (Fig. 3B). Conversely, 76.68% of mAG<sup>+</sup>  
119 cells were EdU<sup>+</sup> and 23.32% of mAG<sup>+</sup> cells were EdU<sup>-</sup> (Fig. S2B), suggesting that that  
120 the majority of mAG<sup>+</sup> cells were in S phase rather than G2. This suggests that the S  
121 phase is longer than the combined G2/M phase by approximately three fold, which is  
122 supported by previous studies (McCullough and Tassava, 1976). In order to study  
123 mitosis in a highly proliferative tissue, we performed immunohistochemistry for  
124 phosphorylated serine 10 histone H3 (pHH3) in 10 dpa regenerating limb blastemas  
125 (n=3) (Fig S2C-F). We found that 89.13% percent of pHH3<sup>+</sup> cells were mAG<sup>+</sup>/mCherry<sup>-</sup>,  
126 2.17% were mAG<sup>+</sup>/mCherry<sup>+</sup>, 0% were mAG<sup>-</sup>/mCherry<sup>+</sup>, and 8.69% were mAG<sup>-</sup>  
127 /mCherry<sup>-</sup> (Fig. 2C, Fig S2C-F). As expected, some pHH3<sup>+</sup> had neither probe signal  
128 since Geminin is known to degrade in the late stages of M stage (McGarry and  
129 Kirschner, 1998). Overall, the high correspondence between EdU and pHH3 with mAG<sup>+</sup>  
130 expression shows that mAG-zGem effectively marks cells in both S and M phase.

131

132 We next identified cells at each stage of the cell cycle according to DAPI and EdU  
133 staining. Each stage of the cell cycle was observed in proliferating tissues and had  
134 predictable genomic structure, EdU incorporation, pHH3 staining, and Fucci reporter  
135 expression (Fig. 2D-M). Collectively, these results demonstrate that our Fucci  
136 construct correctly and reproducibly labels specific stages of the cell cycle.

137

### 138 **Real-time *in-vivo* imaging of Fucci expression**

139

140 To determine the feasibility of real-time, *in-vivo* imaging of Fucci tissue, we imaged  
141 cycling epithelial cells in an anesthetized stage 32 larva mounted in 0.3% agarose (Fig.  
142 3A-E, Movie 1). Here we observed that dividing mAG<sup>+</sup> cells complete the process of  
143 mitosis in under 30 minutes to produce two daughter cells with fading mAG intensity  
144 (Fig. 3A-E, Movie 2). During this process, we observe both the formation of the mitotic  
145 spindle in prophase and cytokinesis after chromosome separation. We did not observe  
146 any cell transition from mAG to mCherry or vice versa. This is likely due to the  
147 shortening of the G1 phase during embryonic development (Siefert et al., 2015), which  
148 would prevent the accumulation of mCherry protein to provide a detectable signal while  
149 transitioning from M phase or prior to transitioning to S phase.

150

151 To determine the origin of cells during tail regeneration, we performed live imaging of a  
152 regenerating tail in a stage 36 Fucci animal. After amputation, the anesthetized larva  
153 was immediately embedded in 0.3% agarose and imaged every 30 minutes over 60  
154 hours (Movie 3). During this 60 hour imaging experiment, we observed early wound  
155 healing (Fig. 3G), blastema formation (Fig. 3H), and myomeric muscle development  
156 (Fig. 3I). By 8 hours post amputation (hpa), the tail stump was completely covered by a  
157 thin layer of epithelium that had both mAG<sup>+</sup> cells and mCherry<sup>+</sup> cells (Fig. 3G). Shortly  
158 after, an early blastema was observed in the posterior tail tip by 17.5 hpa (Fig. 3H),  
159 composed mostly of mAG<sup>+</sup> cells. At this time point, early myomeric muscle formation  
160 was observed along the anteroposterior axis of the tail, characterized by regularly  
161 spaced bar-shaped groups of mCherry<sup>+</sup> cells (Fig. 3H-I). By 37.5 hpa, mAG<sup>+</sup> cells at the

162 amputation plane started accumulating at the base of the blastema (Fig. 3I). After  
163 approximately 40 hours of imaging, cells in the blastema seemed to be dying. However,  
164 subsequent time points showed continued maturation of the tail myomere muscle and a  
165 general shift from mostly mAG cells in the tail to mCherry cells.

166

167 To track migrating and dividing mAG<sup>+</sup> cells, we used the Fiji plugin TrackMate (Tinevez  
168 et al., 2017). With this, we tracked the position of mAG<sup>+</sup> cells 10 hours before and after  
169 each frame (Fig. 3J-M, Movie 4). This allowed us to visualize the path cells took to  
170 contribute to the regenerated tail. Interestingly, during the early blastema formation  
171 phase of the movie we observed a general trend for dorsal tail cells to migrate dorsally,  
172 ventral cells to migrate ventrally, and cells in the midline to migrate in the direction of the  
173 blastema (Fig. J-K). At later timepoints in the movie, we observed that the intense mAG<sup>+</sup>  
174 cells adjacent to the amputation plane were migrating into the tail blastema (Fig. 3I),  
175 further demonstrating the local origin of blastema cells.

176

177 We quantified changes in fluorescence in mAG by dividing the regenerating tail into  
178 rectangles with a 30  $\mu\text{m}$  width anterior and posterior to the amputation plane (Fig. S3).  
179 The raw integrated density for each channel was measured for each box and  
180 normalized to the total tail area within each rectangle, providing a measure of intensity  
181 per area. These results showed an increase in the intensity of mAG fluorescence in  
182 rectangles starting 30  $\mu\text{m}$  anterior to the amputation plane and continuing into the  
183 regenerating tail tip, indicating that proliferation is highest in the blastema and in cells 30  
184  $\mu\text{m}$  anterior to from the blastema (Fig. 3N). Anterior to the amputation plane the mAG  
185 intensity was highest at earliest time points and steadily decreased after 60 hours of  
186 imaging (Fig. 3N). The opposite trend was observed for mCherry fluorescence, where  
187 the intensity increased after 60 hours of imaging (Fig. 3O). These results indicate an  
188 increase in the total number of cells at resting state, which may represent the  
189 termination of the rapid proliferation program employed during embryonic development.

190

191 **Multimodal imaging provides cell type identity to FUCCI tissues**

192

193 A limitation to FUCCI sensors is absence of cell type information as a result of using two  
194 fluorescent proteins. This limits robust cell characterization using imaging modalities  
195 including immunohistochemistry (IHC) and fluorescence *in-situ* hybridization (FISH)  
196 along with FUCCI imaging. To overcome this limitation, we observed that mAG and  
197 mCherry can be sufficiently photobleached after imaging to allow for multimodal imaging  
198 (Fig. 4A). We first performed version 3 hybridization chain reaction FISH (V3.HCR-  
199 FISH) (Choi et al., 2018) for *Shh* using Alexa-fluor 647 on an EdU pulsed, homeostatic  
200 FUCCI spinal cord (Fig. 4B). We next photobleached the endogenous FUCCI signal and  
201 wiped the *Shh* probes with 80% formamide (Fig. 4C). Then a subsequent round of  
202 V3.HCR-FISH was performed for *Pax7* and *B3Tub* (Fig. 4D). Imaging and subsequent  
203 wiping of these probes was followed by EdU labeling (Fig. 4E). EdU signal was then  
204 removed with DNase, and IHC was performed for B3TUB (Fig. 4F). The images from  
205 each round were aligned to the DAPI image from the first round allowing imaging of four  
206 modalities (transgenic reporter, FISH, click-chemistry, and IHC) in the same tissue  
207 section (Fig 4G-J). This analysis shows that cell type identification can be performed  
208 along with the study of cell division in FUCCI tissue.

209

### 210 **Regenerating FUCCI limbs reveal distinct regions of proliferative and non-** 211 **proliferative zones in the limb blastema**

212

213 To visualize cell cycling following limb amputation, we imaged uninjured limbs (Fig.  
214 S5A-B) and regenerating limbs from five animals at 1, 3, 5, 7, 10, and 14 dpa (Fig. 5A-  
215 L). To quantify the location of proliferation following amputation, we calculated the  
216 average distance between the amputation plane and the distal mCherry<sup>+</sup> muscle  
217 boundary line. We found that mAG<sup>+</sup> cells were abundant proximal to the amputation  
218 plane as early as 1 dpa, and that these mAG<sup>+</sup> cells were located on average 243.85  $\mu$ m  
219 proximal to the amputation plane (Fig. 5M). This distance from the amputation plane  
220 was significantly larger than the same measurement at 5, 7, and 14 dpa (One-way  
221 ANOVA with a Tukey-Kramer multiple comparison,  $p < 0.05$ ). These findings correspond  
222 well with previous irradiation studies, where it was determined that cells from at least  
223 500  $\mu$ m proximal to the amputation plane are necessary and sufficient for regeneration

224 (Butler, 1933). As the limb regenerates, we observed fewer mAG<sup>+</sup> cells proximal to the  
225 amputation as more mAG<sup>+</sup> cells accumulated within the blastema (Fig. 5M). This  
226 observation suggests that the supply of proliferating cells becomes less dependent on  
227 cells proximal to the amputation plane at later time points during regeneration.

228

229 To determine the cell type of the mAG<sup>+</sup> and mCherry<sup>+</sup> cells in regenerating limbs, we  
230 visualized FUCCI probe expression in whole mount with light sheet fluorescence  
231 microscopy (Fig. 5N-S, Fig. S5 C-L, Movies 5-6). The majority of uninjured tissue  
232 including fibroblasts, epithelial cells, and chondrocytes were mCherry<sup>+</sup>. Most muscle  
233 cells observed were mAG<sup>+</sup>/mCherry<sup>+</sup>, suggesting cell cycle arrest at the restriction point  
234 (R-point) of the cell cycle. This finding is consistent with a similar G1/S arrest in FUCCI  
235 mouse cardiomyocytes (Alvarez et al., 2019). Very few mAG<sup>+</sup> cells were observed in  
236 uninjured tissue (Fig. S5B-C,E). At 1 dpa, we observed several mAG<sup>+</sup> cell types,  
237 including the wound epithelium, perichondrium, and in some fibroblasts of the  
238 mesenchyme (Fig. S5F). These cell types appear to remain mAG<sup>+</sup> until blastema  
239 formation at 7 dpa, where fewer chondrocytes, perichondrial cells, and epithelial cells  
240 are mAG<sup>+</sup> (Fig. SG-I). From 7-14 dpa, most of the mAG<sup>+</sup> cells are located within the  
241 mesenchyme, further showing that cells proximal to the amputation plane less  
242 frequently proliferate at later time points during limb regeneration (Fig. SJ-K). At 10 and  
243 14 dpa, we observed a small population of cells at the distal-most tip of the blastema  
244 that were mAG<sup>-</sup>/mCherry<sup>+</sup> (Fig. 5K-L). We sectioned EdU pulsed 10 dpa blastemas for  
245 histological analysis (n=3) and found that this mAG<sup>-</sup>/mCherry<sup>+</sup> population was  
246 composed of the distal-most epithelial cells of the AEC (Fig. 5T). In one sample, a small  
247 number of these cells was observed in the distal-most portion of the blastema  
248 mesenchyme (Fig. 5T). We then sectioned 14 dpa blastemas (n=3) and observed the  
249 presence of these distal-most, mesenchymal mAG<sup>-</sup>/mCherry<sup>+</sup> cells in all three samples  
250 (Fig. S6), suggesting that this population of cells is more abundant at later stages during  
251 regeneration. The observation that the highest proliferation levels being in the middle-  
252 proximodistal region of the blastema has been observed by others in salamanders  
253 (Farkas et al., 2016; McCusker et al., 2015b) and in regenerating zebrafish fins (Hirose  
254 et al., 2014).

255

256 For quantification of blastema cells, we performed flow cytometry analysis on 10 dpa  
257 FUCCI blastemas (n=10) (Fig. 5V-Y). In total, 5,682 cells were analyzed of the total  
258 10,000 events. Of these cells, 25.2% mAG<sup>+</sup>/mCherry<sup>-</sup>, 53.9% were mAG<sup>-</sup>/mCherry<sup>+</sup>,  
259 1.1% were mAG<sup>+</sup>/mCherry<sup>+</sup>, and 16.3% were mAG<sup>-</sup>/mCherry<sup>-</sup>. Although, these results  
260 do not exactly correspond with our tissue section quantification (n=3), where we found  
261 that 44.68% mAG<sup>+</sup>/mCherry<sup>-</sup>, 14.96% were mAG<sup>-</sup>/mCherry<sup>+</sup>, 14.06% were  
262 mAG<sup>+</sup>/mCherry<sup>+</sup>, and 26.3% were mAG<sup>-</sup>/mCherry<sup>-</sup>, it is not surprising considering some  
263 mCherry<sup>+</sup> cells just proximal to the blastema were collected for dissociation (Fig. 5Z).  
264 Additionally, the amount of autofluorescent blood as well as the cessation of  
265 proliferation that likely occurs as the cells are dissociated prior to FACS analysis may  
266 contribute to the discrepancy.

267

### 268 **Spinal cord amputation induces a proliferation response 5 mm from the injury**

269

270 To determine the location of proliferating cells along the anteroposterior (AP) axis of the  
271 regenerating spinal cord, we collected EdU pulsed FUCCI tissue sections (n=4) at  
272 various locations along the AP axis with respect to the most posterior tip of the  
273 regenerated cartilaginous rod (Fig. 6A). The amputation plane is located between the  
274 250  $\mu$ m anterior and 500  $\mu$ m anterior sections, as the notochord was identified 500  $\mu$ m  
275 anterior to the cartilaginous rod but not at the 250  $\mu$ m anterior section. For comparison,  
276 we sectioned spinal cords from non-regenerating, homeostatic FUCCI animals (n=5).  
277 Quantification included cells within the boundary of the meninges that surrounds the  
278 spinal cord but excluded the meningeal cells themselves (Fig. 6B). mAG<sup>+</sup>/mCherry<sup>-</sup> cells  
279 were consistently around 40% of total cells posteriorly and progressively declined  
280 anteriorly (Fig. 6C-L), which may indicate that cell proliferation is most abundant at or  
281 posterior to the cartilaginous rod tip. This is accompanied by an increase in the number  
282 of mAG<sup>-</sup>/mCherry<sup>+</sup> cells anteriorly along the regenerating AP axis (Fig. 6C-L),  
283 suggesting a shortened G1 phase in regenerating cells which is supported by previous  
284 studies (Rodrigo Albers et al., 2015). Furthermore, we observed a significant increase in  
285 the number of mAG<sup>+</sup>/mCherry<sup>-</sup> cells located 5000  $\mu$ m from the regenerated cartilaginous



286 rod compared to uninjured spinal cords (Two tailed Student's t-Test assuming unequal  
287 variances,  $p=0.0043$ ), suggesting that spinal cord injury induces an increase in cell  
288 cycling beyond 500  $\mu\text{m}$  anterior to the amputation plane (Fig. 6L). Our results also  
289 indicate that the relative abundance of cells in S or G2/M as indicated by  $\text{mAG}^+/\text{EdU}^+$  or  
290  $\text{mAG}^+/\text{EdU}^-$ , respectively, is unchanged across the AP axis (Fig. 6M), suggesting that  
291 the ratio of S:G2 does not significantly change across the regenerating AP axis.  
292 However, a significant difference is detected between the total number of  $\text{mAG}^+/\text{EdU}^+$   
293 cells detected in sections 5000  $\mu\text{m}$  from the cartilaginous rod tip and uninjured spinal  
294 cords (Two tailed Student's t-Test assuming unequal variances,  $p= 0.001$ ) (Fig. 6M). A  
295 statically significant difference between the number of  $\text{mAG}^+/\text{EdU}^-$  cells at these regions  
296 was not detected (Two tailed Student's t-Test assuming unequal variances,  $p= 0.143$ )  
297 (Fig. 6M). Taken together, our results indicate that spinal cord injury induces an  
298 increase in the number of cycling cells along the AP axis 5 mm from the injury  
299 compared to uninjured controls.

300

### 301 **Discussion:**

302

303 Many fundamental questions remain unanswered regarding cell proliferation during  
304 appendage regeneration. How cell cycle dynamics change during regeneration  
305 compared to uninjured limbs, if the cell cycle length is unique to individual regenerating  
306 organs, and if the cell cycle is regulated differently during development versus  
307 regeneration are among some of the many outstanding questions. Previously, these  
308 questions were addressed using a combination of thymidine analogs like EdU and  
309 BrdU, pHH3 antibody labeling, and mitotic figures. However, none of these methods  
310 provide information about multiple cell cycle stages and are unable to be used for live  
311 imaging. FUCCI axolotls provide a powerful means to address these questions in detail  
312 while improving the existing toolbox for the study of cell cycle dynamics during tissue  
313 regeneration. Furthermore, a major advantage of deploying FUCCI sensors in the  
314 axolotl is the amenability of axolotl embryonic tissue to grafting, which has been shown  
315 to be successful for limb connective tissue, muscle cells, epithelium, Schwann cells,  
316 vasculature, neural stem cells, neural crest cells, and teeth primordium (Epperlein et al.,

317 2012; Kragl et al., 2009; Kragl and Tanaka, 2009; Nacu et al., 2013). Grafting CAG  
318 FUCCI tissue onto white embryos will allow for tissue-specific expression without the  
319 need for the generation of new transgenic animals with a tissue specific promoter  
320 driving FUCCI expression.

321

322 While FUCCI sensors in the axolotl are highly useful, some limitations exist. One issue  
323 of our transgenic line is the variable expression across animals and across tissues. This  
324 is particularly obvious in adult animals, where some animals seem to strongly express  
325 only one fluorescent protein. Continuous breeding of the line to d/d mates should  
326 decrease variability across siblings. The use of EdU in FUCCI tissue also has small  
327 limitations. First, the number of  $mAG^+/mCherry^-/EdU^-$  cells may be underrepresented  
328 and the number of  $mAG^+/mCherry^-/EdU^+$  may be overrepresented; after a three hour  
329 pulse of EdU, cells labeled in late S phase will transition to G2 phase prior to collection.  
330 The severity of this issue can be reduced by collecting tissue sooner than 3 hours after  
331 the EdU pulse, but this problem is theoretically always possible. Second, we observed  
332 the presence of  $mAG^-/mCherry^+/EdU^+$  and  $mAG^-/mCherry^-/EdU^+$  cell populations in our  
333 samples. Our quantification suggests that these populations are not highly abundant,  
334 and we speculate that they are detected as a result of the cells not expressing the  
335 FUCCI construct or DNA damage, as EdU is known to be incorporated into cells  
336 undergoing DNA repair (Verbruggen et al., 2014).

337

338 In our study, we highlight the versatility of imaging FUCCI tissue with live imaging,  
339 whole mount imaging, and multimodal imaging. To our knowledge, we present the first  
340 real time, *in-vivo* movie of blastema formation in regenerating axolotl tissue. The  
341 approaches used in this study will be helpful for other groups trying to live image  
342 appendage regeneration in real time, but methods should be optimized. As the  
343 blastema was growing, we observed a large number of dying cells and cells sluffing  
344 from the blastema. After removing the larvae from the agarose, we also noticed that the  
345 blastema was misshapen. We do not think this is an accurate representation of tail  
346 blastema growth and is more likely a result of the blastema growing in the agarose. We  
347 also visualize FUCCI expression in whole mount regenerating limbs with light sheet



348 fluorescence imaging. We attempted to visualize these limbs in 3D after staining for  
349 EdU, but the EdU signal from the 647 channel was too strong and bled into the mCherry  
350 signal. With better filtering, we expect to be able to perform 3D multiscale analysis of  
351 macromolecule synthesis in Fucci tissue. Finally, we outline a method for cell  
352 characterization in transgenic tissue with multimodal imaging. These proof of concept  
353 experiments demonstrate the amount of cell type information one can acquire from a  
354 single Fucci tissue section. We foresee better cell type characterization via multimodal  
355 imaging with more rounds of FISH, multiple macromolecule analogs with unique click-it  
356 compatible functional groups (Duerr et al., 2020), and multiple primary antibodies raised  
357 in different species. One potential limitation of this method is the inefficiency of  
358 photobleaching Fucci signal in large tissues. The spinal cord is an ideal organ for this  
359 analysis, as it can easily fit into a single 20X frame. Thus, photobleaching is contained  
360 to one single tile. If using larger tissue like a limb blastema, many more tiles may require  
361 photobleaching and potentially at a lower magnification, both of which will increase the  
362 time necessary to completely photobleach the Fucci signal. Overall, our method can  
363 be used for robust characterization of cycling cells during tissue regeneration.

364

## 365 **Methods:**

### 366 **Animal procedures**

367 All transgenic animals were bred at Northeastern University, and all procedures and  
368 surgeries were approved by the Northeastern University Institutional Animal Care and  
369 Use Committee. Surgeries were performed while axolotls were anaesthetized in 0.01%  
370 benzocaine. EdU was administered via intraperitoneal injection at 8.0 ng/g animal and  
371 samples were collected three hours after injection.

372

### 373 **Transgenesis**

374 Transgenesis was performed via I-SceI meganuclease digestion according to Khattak  
375 2009. Briefly, 1 µg of purified, CAG Fucci plasmid was mixed in solution with 2 µL NEB  
376 Cutsmart buffer and 1 µL I-SceI enzyme, filled to a final volume of 10 µL with nuclease  
377 free water to generate the Fucci injection cocktail. Single cell, d/d axolotl embryos  
378 were injected with 5 nL of Fucci injection cocktail and grown to stage 45 for phenotype

379 assessment. Due to the beta-actin promoter in CAG, the most intense FUCCI  
380 expression was observed in myomeric muscle of developing tails. Larvae with strong,  
381 ubiquitous expression were identified and grown to sexual maturity.

382

### 383 **Histology and staining**

384 Samples were fixed in 4% PFA overnight at 4°C, and after washing with 1X PBS three  
385 times for 5 minutes, samples were cryoprotected in 30% sucrose until equilibrated.

386 Samples were then placed in OCT and frozen at -80°C. Frozen samples were sectioned  
387 with a cryostat to obtain 10 µm sections. Slides were then baked at 65°C for 15 minutes.

388 Residual OCT was removed from slides by placing in water for 5 minutes at room  
389 temperature. From this step, the slides are ready for click-chemistry, IHC, or FISH:

390

#### 391 *EdU labeling via click chemistry*

392 For EdU detection, we used an Alexa-fluor 647 azide plus probe from  
393 clickchemistrytools.com (Product number: 1482). The 1 mL click-it cocktail was made as  
394 follows: 885 µL 1X Tris, 10 µL 50 mM CuSO<sub>4</sub> (0.5 mM final), 2 µL Alexa-fluor 647 azide  
395 plus (2 µM final), 100 µL 100 mM sodium ascorbate (10 mM final). This cocktail was  
396 applied to slides for 30 minutes at room temperature.

397

#### 398 *IHC*

399 Slides were incubated in blocking buffer (15 µL goat serum in 1 mL 1X PBS) for 30  
400 minutes. Rabbit anti-pHH3 antibodies were diluted in blocking buffer at a 1:400  
401 concentration and applied to slides overnight at 4°C. Slides were washed three times for  
402 5 minutes each with 1X PBS, and 647 anti-rabbit secondary antibodies (diluted 1:500 in  
403 1X PBS) were applied to slides for 30 minutes at room temperature.

404

#### 405 *Multi-round V3.HCR-FISH*

406 All of the following steps are conducted using RNase free reagents. Slides were placed  
407 in 100% ethanol at room temperature for 1 hour. Following three 5 minute washes with  
408 1X PBS, slides were prehybridized with hybridization buffer (Molecular Instruments) for  
409 30 minutes at 37°C. Probe stocks for a particular transcript of interest were made to

410 contain 1  $\mu\text{M}$  of each oligo in 200  $\mu\text{L}$  of RNase free water. Probe sequences for *Shh*,  
411 *B3Tub*, and *Pax7* are provided in the supplementary material. Probe stocks were further  
412 diluted 1:200 in hybridization buffer and applied to slides overnight at 37°C. Slides were  
413 washed with formamide wash buffer (Molecular Instruments) three times for 15 minutes  
414 at 37°C to remove unbound probe, then washed twice with 5X SSCT (20X saline  
415 sodium citrate with 0.1% Tween 20) for 15 minutes at room temperature. Amplification  
416 buffer (Molecular Instruments) was then applied to the slides for 30 minutes at room  
417 temperature. Fluorescent hairpins for each initiator (Molecular Instruments) were  
418 prepared by heating H1 and H2 hairpins to 95°C for 90 seconds. Hairpins were allowed  
419 to cool to room temperature in the dark, then diluted 1:50 in amplification buffer and  
420 applied to slides overnight at room temperature. Slides were then washed twice for 30  
421 minutes with 5X SSCT at room temperature.

422

423 After these protocols, cell nuclei were stained with DAPI (2.86  $\mu\text{M}$ ) for five minutes at  
424 room temperature. Following a five minute 1X PBS wash at room temperature, slides  
425 were mounted with SlowFade gold antifade mountant (Thermo S36936) and imaged  
426 using a Zeiss LSM 800 confocal microscope.

427

### 428 **Live Fucci imaging**

429 Larvae used for live imaging were mounted in a 50 x 9 mm petri dish in 0.3% low melt  
430 agarose diluted in 0.005% benzocaine. All live images were acquired using a Zeiss LSM  
431 880 confocal microscope fitted with a humidification chamber to prevent sample  
432 desiccation. Larvae were imaged at 10X magnification. For live imaging of tail  
433 regeneration, we imaged two adjacent tiles to accommodate for growth during imaging.  
434 Additionally, to accommodate for cells moving in and out of the focal plane, we imaged  
435 four planes in the z axis and merged these planes together in a maximum intensity  
436 projection. To prevent photobleaching of the Fucci probes, we used 1.0% laser power  
437 for each channel. Larvae were removed from agarose after imaging and placed in  
438 salamander housing water. Larvae were swimming and feeding one week after imaging  
439 with no visible signs of illness or distress.

440

## 441 **Multimodal imaging**

442 EdU pulsed FUCCI spinal cords were collected as outlined above. In the first round of  
443 multimodal imaging, we performed V3.HCR-FISH for *Shh* with 647 hairpins. The  
444 endogenous FUCCI signal and V3.HCR-FISH was then imaged. To photobleach the  
445 FUCCI signal, the 488 and 594 lasers were set to 100% laser power and were directed  
446 onto the spinal cord for 40 minutes. We found that the DAPI signal was weakened after  
447 this photobleaching, but still present. The V3.HCR-FISH signal was sufficiently  
448 photobleached, but to ensure *Shh* probes were not amplified in the subsequent round of  
449 FISH, the slides were washed with 80% formamide four times for 15 minutes each at  
450 37°C. The slides were washed in 5X SSCT twice for 15 minutes each at room  
451 temperature, prehybridized with hybridization buffer for 30 minutes at 37°C, and  
452 rehybridized with *Pax7* and *B3Tub* probes for the second round of multimodal imaging.  
453 These probes were amplified with 647 and 488 hairpins, respectively. Slides were  
454 imaged, and probes were again removed with four 15 minute washes of 80% formamide  
455 at 37°C. Slides were washed three times with 1X PBS, and the click-it cocktail outlined  
456 above was used with Alexa-fluor 647 azide plus probes for EdU labeling in the third  
457 round of multimodal imaging. Slides were imaged and treated with DNase I (NEB  
458 M0303) overnight at room temperature. DNase I was applied to slides without buffer,  
459 and enough was used to cover the entire section being imaged. The next day, we  
460 performed IHC with rabbit anti-B3TUB antibodies (1:500) and applied anti-rabbit 647  
461 antibodies the subsequent day. Slides were then imaged for the final round of  
462 multimodal imaging. Adobe Photoshop was used to align the images from each round  
463 onto the original DAPI image. All images were obtained with a Zeiss LSM 800 confocal  
464 microscope.

465

## 466 **Whole mount FUCCI imaging**

467 To prepare whole mount tissue, limbs were fixed in 4% PFA overnight at 4°C. Limbs  
468 were then washed with 1X PBS three times for 5 minutes, and dehydrated in an  
469 increasing methanol series (25% MeOH/75% 1X PBS, 50% MeOH/50% 1X PBS, 75%  
470 MeOH/25% 1X PBS, each step for 5 minutes at room temperature), and stored in 100%  
471 methanol at -20°C for up to 6 months prior to imaging. Once ready to be imaged, the

472 limbs were rehydrated in a decreasing methanol series (75% MeOH/25% 1X PBS, 50%  
473 MeOH/50% 1X PBS, 25% MeOH/75% 1X PBS, each step for 5 minutes at room  
474 temperature) and washed once with 1X PBS for 5 minutes. The samples were washed  
475 three times with 1X PBST (Triton 100X) for 5 minutes at room temperature. We found  
476 that a 90 minute 0.5% trypsin treatment at room temperature with rocking improved light  
477 penetration of FUCCI samples without appreciable changes in intensity of mAG and  
478 mCherry. After trypsin treatment, samples were washed with deionized water three  
479 times for 5 minutes at room temperature. The limbs were then placed in 100% acetone  
480 for 20 minutes at -20°C. Afterwards, the samples were incubated in deionized water for  
481 10 minutes at room temperature. Samples were again washed with 1X PBS three times  
482 for 5 minutes, mounted in 1.5% low melt agarose, and refractive index matched with  
483 EasyIndex RI 1.465 (LifeCanvas Technologies) overnight at 4°C. Three dimensional  
484 images were obtained using a Zeiss light sheet Z1 microscope with Zen software. All  
485 post processing for visualization was performed using Arivis software.

486

#### 487 **Cell dissociation and Flow Cytometry**

488 Ten 10 dpa blastemas from white strain or FUCCI animals (3-5cm snout to tail tip), were  
489 collected and pooled together in a 6-well plate. The wound epithelium was not surgically  
490 removed. Blastemas were incubated on ice in 0.35 mg/mL Liberase for 20 minutes  
491 during transfer to FACS core facility and were then incubated at room temperature with  
492 gentle agitation. Every 10 minutes, the tissue was manually dissociated with forceps by  
493 teasing the tissue apart. This was repeated until there was a sufficient single cell  
494 suspension (checked under the microscope) while the wound epithelium remained  
495 intact. Using 1 mL of 80% PBS, the cell suspension was filtered using a 35 µm filter  
496 tube, leaving behind the wound epithelium. The strainer was washed with an additional  
497 1 mL of 80% PBS.

498

499 The filtered single cell suspensions were run on a BD FACSAria Fusion Cell Sorter  
500 (UMass Boston Flow Cytometry Core) using the 100 µm nozzle and the FSC 2.0 ND  
501 filter. The gates for the blastema cell population were set on the blastema cells from the  
502 white animal using forward and side scatter. Using the forward scatter and side scatter

503 plot, the cell population was gated to separating it from debris and doublets. A sample  
504 of the gated population was sorted, and the presence of singlet cells was conformed  
505 with microscopy. The gated cell population was then analyzed on a PE-Texas Red and  
506 FITC scatter plot to gate the fluorescent negative cell population. The same gates were  
507 then used when the FUCCI blastema cells were filtered and run through the cell sorter.  
508 Gates were added to quantify the red, green, and double positive populations. Gates for  
509 fluorescent populations were also confirmed by sorting and validating cell populations  
510 with fluorescent microscopy.

511

### 512 **Data analysis**

513 FUCCI<sup>+</sup> cells were quantified either manually in Adobe Photoshop or with Cellpose  
514 (Stringer et al., 2021) combined with custom Fiji scripts (Schindelin et al., 2012), which  
515 are available in the supplementary information. Fiji scripts for quantification of  
516 mAG/mCherry intensity changes during tail regeneration are also available in the  
517 supplementary information. Limb blastema amputation plane to mCherry<sup>+</sup> muscle line  
518 measurements were made using the InteredgeDistance macro on Fiji. Data processing  
519 and statistical analysis were conducted on Microsoft Excel and Matlab.

520

### 521 **Acknowledgements**

522 The authors would like to thank Jackson Griffiths for assisting with transgenic animal  
523 care during the COVID-19 pandemic lockdown, Ester Comellas for assistance with data  
524 analysis, both Guoxin Rong and Alex Lovely for imaging assistance, and Malcom  
525 Maden for early conceptual discussions on the project. Images were obtained from the  
526 Northeastern University Chemical Imaging of Living Systems core. We thank the  
527 Institute for Chemical Imaging of Living Systems at Northeastern University for  
528 consultation and imaging support. Non-transgenic animals were obtained from the  
529 Ambystoma Genetic Stock Center funded through NIH grant P40-OD019794.

530

### 531 **Competing interests**

532 The authors have no competing interests to disclose.

533

534 **Funding**

535 The work from this paper was funded by NIH grant R01HD099174 and by NSF grants  
536 1558017 and 1656429.

537

538 **References**

539

540 **Abe, T., Sakaue-Sawano, A., Kiyonari, H., Shioi, G., Inoue, K.-i., Horiuchi, T., Nakao, K.,**  
541 **Miyawaki, A., Aizawa, S. and Fujimori, T.** (2013). Visualization of cell cycle in mouse  
542 embryos with Fucci2 reporter directed by *Rosa26* promoter. *Development*  
543 **140**, 237-246.

544 **Alvarez, R., Jr., Wang, B. J., Quijada, P. J., Avitabile, D., Ho, T., Shaitrit, M., Chavarria, M.,**  
545 **Firouzi, F., Ebeid, D., Monsanto, M. M., et al.** (2019). Cardiomyocyte cell cycle dynamics  
546 and proliferation revealed through cardiac-specific transgenesis of fluorescent  
547 ubiquitinated cell cycle indicator (FUCCI). *J Mol Cell Cardiol* **127**, 154-164.

548 **Butler, E. G.** (1933). The effects of X-radiation on the regeneration of the fore limb of  
549 *Amblystoma* larvae. *Journal of Experimental Zoology* **65**, 271-315.

550 **Choi, H. M. T., Schwarzkopf, M., Fornace, M. E., Acharya, A., Artavanis, G., Stegmaier, J.,**  
551 **Cunha, A. and Pierce, N. A.** (2018). Third-generation in situ hybridization chain reaction:  
552 multiplexed, quantitative, sensitive, versatile, robust. *Development* **145**.

553 **Currie, J. D., Kawaguchi, A., Traspas, R. M., Schuez, M., Chara, O. and Tanaka, E. M.** (2016).  
554 Live Imaging of Axolotl Digit Regeneration Reveals Spatiotemporal Choreography of  
555 Diverse Connective Tissue Progenitor Pools. *Dev Cell* **39**, 411-423.

556 **Duerr, T. J., Comellas, E., Jeon, E. K., Farkas, J. E., Joetzjer, M., Garnier, J., Shefelbine, S. J. and**  
557 **Monaghan, J. R.** (2020). 3D visualization of macromolecule synthesis. *Elife* **9**.

558 **Epperlein, H. H., Khattak, S., Knapp, D., Tanaka, E. M. and Malashichev, Y. B.** (2012). Neural  
559 crest does not contribute to the neck and shoulder in the axolotl (*Ambystoma*  
560 *mexicanum*). *PLoS One* **7**, e52244.

561 **Farkas, J. E., Freitas, P. D., Bryant, D. M., Whited, J. L. and Monaghan, J. R.** (2016). Neuregulin-  
562 1 signaling is essential for nerve-dependent axolotl limb regeneration. *Development*  
563 **143**, 2724-2731.

564 **Hirose, K., Shiomi, T., Hozumi, S. and Kikuchi, Y.** (2014). Mechanistic target of rapamycin  
565 complex 1 signaling regulates cell proliferation, cell survival, and differentiation in  
566 regenerating zebrafish fins. *BMC Dev Biol* **14**, 42-42.

567 **Khattak, S., Richter, T. and Tanaka, E. M.** (2009). Generation of transgenic axolotls  
568 (*Ambystoma mexicanum*). *Cold Spring Harb Protoc* **2009**, pdb.prot5264.

569 **Khattak, S., Schuez, M., Richter, T., Knapp, D., Haigo, S. L., Sandoval-Guzmán, T., Hradlikova,**  
570 **K., Duemmler, A., Kerney, R. and Tanaka, E. M.** (2013). Germline transgenic methods  
571 for tracking cells and testing gene function during regeneration in the axolotl. *Stem Cell*  
572 *Reports* **1**, 90-103.

573 **Kragl, M., Knapp, D., Nacu, E., Khattak, S., Maden, M., Epperlein, H. H. and Tanaka, E. M.**  
574 (2009). Cells keep a memory of their tissue origin during axolotl limb regeneration.  
575 *Nature* **460**, 60-65.



- 576 **Kragl, M. and Tanaka, E. M.** (2009). Grafting axolotl (*Ambystoma mexicanum*) limb skin and  
577 cartilage from GFP+ donors to normal hosts. *Cold Spring Harb Protoc* **2009**,  
578 [pdb.prot5266](#).
- 579 **McCullough, W. and Tassava, R.** (1976). Determination of the Blastema Cell Cycle in  
580 Regenerating Limbs of the Larval Axolotl, *Ambystoma Mexicanum*.
- 581 **McCusker, C., Bryant, S. V. and Gardiner, D. M.** (2015a). The axolotl limb blastema: cellular and  
582 molecular mechanisms driving blastema formation and limb regeneration in tetrapods.  
583 *Regeneration (Oxf)* **2**, 54-71.
- 584 **McCusker, C. D., Athippozhy, A., Diaz-Castillo, C., Fowlkes, C., Gardiner, D. M. and Voss, S. R.**  
585 (2015b). Positional plasticity in regenerating *Ambystoma mexicanum* limbs is associated  
586 with cell proliferation and pathways of cellular differentiation. *BMC Dev Biol* **15**, 45.
- 587 **McGarry, T. J. and Kirschner, M. W.** (1998). Geminin, an inhibitor of DNA replication, is  
588 degraded during mitosis. *Cell* **93**, 1043-1053.
- 589 **McHedlishvili, L., Epperlein, H. H., Telzerow, A. and Tanaka, E. M.** (2007). A clonal analysis of  
590 neural progenitors during axolotl spinal cord regeneration reveals evidence for both  
591 spatially restricted and multipotent progenitors. *Development* **134**, 2083.
- 592 **Nacu, E., Glausch, M., Le, H. Q., Damanik, F. F. R., Schuez, M., Knapp, D., Khattak, S., Richter,  
593 T. and Tanaka, E. M.** (2013). Connective tissue cells, but not muscle cells, are involved in  
594 establishing the proximo-distal outcome of limb regeneration in the axolotl.  
595 *Development* **140**, 513.
- 596 **Nishitani, H., Lygerou, Z. and Nishimoto, T.** (2004). Proteolysis of DNA replication licensing  
597 factor Cdt1 in S-phase is performed independently of geminin through its N-terminal  
598 region. *J Biol Chem* **279**, 30807-30816.
- 599 **Rajan, S. G., Gallik, K. L., Monaghan, J. R., Uribe, R. A., Bronner, M. E. and Saxena, A.** (2018).  
600 Tracking neural crest cell cycle progression in vivo. *Genesis* **56**, e23214.
- 601 **Rodrigo Albors, A., Tazaki, A., Rost, F., Nowoshilow, S., Chara, O. and Tanaka, E. M.** (2015).  
602 Planar cell polarity-mediated induction of neural stem cell expansion during axolotl  
603 spinal cord regeneration. *Elife* **4**, e10230-e10230.
- 604 **Sakaue-Sawano, A., Kurokawa, H., Morimura, T., Hanyu, A., Hama, H., Osawa, H., Kashiwagi,  
605 S., Fukami, K., Miyata, T., Miyoshi, H., et al.** (2008). Visualizing spatiotemporal  
606 dynamics of multicellular cell-cycle progression. *Cell* **132**, 487-498.
- 607 **Sandoval-Guzmán, T., Wang, H., Khattak, S., Schuez, M., Roensch, K., Nacu, E., Tazaki, A.,  
608 Joven, A., Tanaka, E. M. and Simon, A.** (2014). Fundamental differences in  
609 dedifferentiation and stem cell recruitment during skeletal muscle regeneration in two  
610 salamander species. *Cell Stem Cell* **14**, 174-187.
- 611 **Schindelin, J., Arganda-Carreras, I., Frise, E., Kaynig, V., Longair, M., Pietzsch, T., Preibisch, S.,  
612 Rueden, C., Saalfeld, S., Schmid, B., et al.** (2012). Fiji: an open-source platform for  
613 biological-image analysis. *Nature Methods* **9**, 676-682.
- 614 **Siefert, J. C., Clowdus, E. A. and Sansam, C. L.** (2015). Cell cycle control in the early embryonic  
615 development of aquatic animal species. *Comparative Biochemistry and Physiology Part*  
616 *C: Toxicology & Pharmacology* **178**, 8-15.
- 617 **Stocum, D. L.** (2017). Mechanisms of urodele limb regeneration. *Regeneration* **4**, 159-200.
- 618 **Stringer, C., Wang, T., Michaelos, M. and Pachitariu, M.** (2021). Cellpose: a generalist  
619 algorithm for cellular segmentation. *Nature Methods* **18**, 100-106.



- 620 **Sugiyama, M., Sakaue-Sawano, A., Imura, T., Fukami, K., Kitaguchi, T., Kawakami, K.,**  
621 **Okamoto, H., Higashijima, S. and Miyawaki, A.** (2009). Illuminating cell-cycle  
622 progression in the developing zebrafish embryo. *Proc Natl Acad Sci U S A* **106**, 20812-  
623 20817.
- 624 **Tanaka, E. M.** (2016). The Molecular and Cellular Choreography of Appendage Regeneration.  
625 *Cell* **165**, 1598-1608.
- 626 **Tinevez, J. Y., Perry, N., Schindelin, J., Hoopes, G. M., Reynolds, G. D., Laplantine, E.,**  
627 **Bednarek, S. Y., Shorte, S. L. and Eliceiri, K. W.** (2017). TrackMate: An open and  
628 extensible platform for single-particle tracking. *Methods* **115**, 80-90.
- 629 **Tsai, S. L., Baselga-Garriga, C. and Melton, D. A.** (2020). Midkine is a dual regulator of wound  
630 epidermis development and inflammation during the initiation of limb regeneration.  
631 *Elife* **9**.
- 632 **Verbruggen, P., Heinemann, T., Manders, E., von Bornstaedt, G., van Driel, R. and Höfer, T.**  
633 (2014). Robustness of DNA repair through collective rate control. *PLoS Comput Biol* **10**,  
634 e1003438.
- 635 **Yin, K., Ueda, M., Takagi, H., Kajihara, T., Sugamata Aki, S., Nobusawa, T., Umeda-Hara, C. and**  
636 **Umeda, M.** (2014). A dual-color marker system for in vivo visualization of cell cycle  
637 progression in Arabidopsis. *Plant J* **80**, 541-552.
- 638 **Zielke, N. and Edgar, B. A.** (2015). FUCCI sensors: powerful new tools for analysis of cell  
639 proliferation. *Wiley Interdiscip Rev Dev Biol* **4**, 469-487.
- 640 **Zielke, N., Korzelius, J., van Straaten, M., Bender, K., Schuhknecht, Gregor F. P., Dutta, D.,**  
641 **Xiang, J. and Edgar, Bruce A.** (2014). Fly-FUCCI: A Versatile Tool for Studying Cell  
642 Proliferation in Complex Tissues. *Cell Reports* **7**, 588-598.

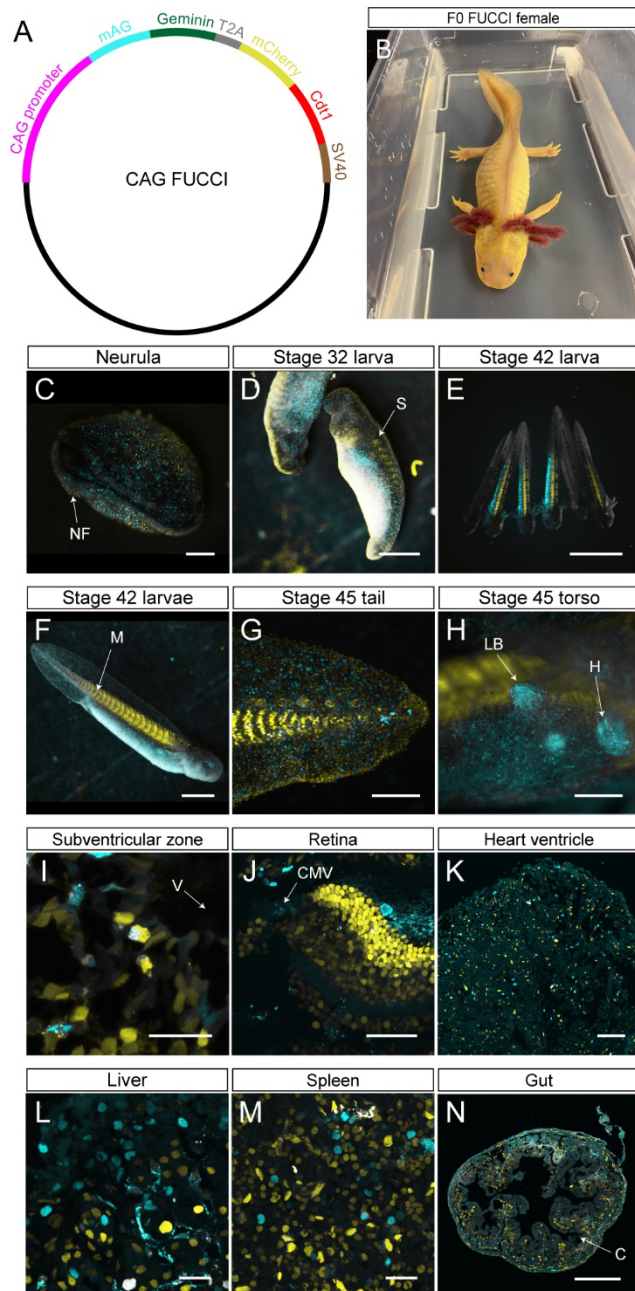

643 **Figure 1: Fucci probes are expressed in developing and adult, homeostatic**  
 644 **tissue**

645 (A) Plasmid map for CAG Fucci. (B) Sexually mature, F0 Fucci female crossed with  
 646 white d/d males to generate the F1 clutch used in the study. (C) Stage 17 neurula  
 647 expressing Fucci probes. NF= neural fold. Scale bar= 500  $\mu$ m. (D) Stage 32 larva. S=  
 648 somite. Scale bar= 1 mm. (E) Six stage 42 larvae with negative, ubiquitous, and variable  
 649 expression patterns. Scale bar= 5 mm. (F) Individual stage 42 larva. M= myomeres.

650 Scale bar= 1 mm. (G) Posterior tail tip of a stage 45 larva. Scale bar= 500  $\mu$ m. (H)  
651 Torso of a stage 45 larva. LB= limb bud. H= heart. Scale bar= 500  $\mu$ m. (I)  
652 Subventricular zone of the adult brain. V= ventricle. Scale bar= 50  $\mu$ m. (J) Adult retina.  
653 CMZ= ciliary marginal zone. Scale bar= 100  $\mu$ m. (K) Adult heart ventricle. Scale bar=  
654 100  $\mu$ m. (L) Adult liver. Scale bar= 50  $\mu$ m. (M) Adult spleen. Scale bar= 50  $\mu$ m. (N)  
655 Adult gut. C= crypt. Scale bar= 200  $\mu$ m. Individual channels for I-J are available with  
656 EdU staining in Fig. S1.

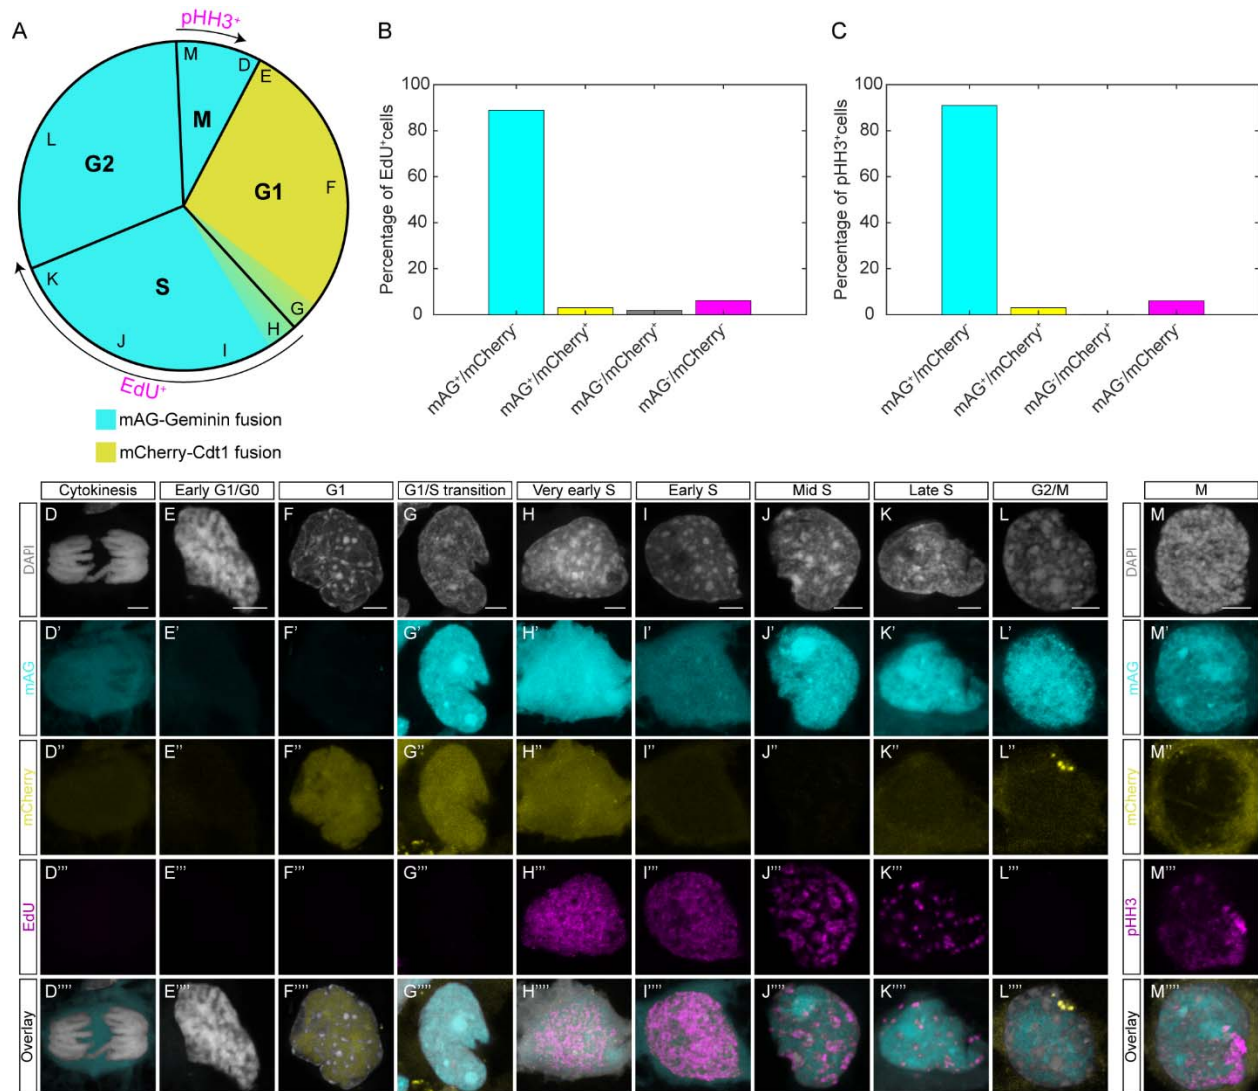

657 **Figure 2: Validation of Fucci expression with EdU and pHH3**

658 (A) Schematic of the cell cycle with expected staining patterns of EdU and pHH3. Note  
 659 that EdU may label cells in early G2 as a result of a three hour chase and that pHH3  
 660 weakens during late M phase. Letters in the outer edge of the schematic represent the  
 661 location in the cell cycle of cells from panels D-M. (B) Characterization of EdU<sup>+</sup> cells in  
 662 14 dpa regenerating spinal cords. (C) Characterization of pHH3<sup>+</sup> cells in 10 dpa  
 663 regenerating limb blastemas. (D-L) Individual cells from EdU pulsed tissue at every cell  
 664 cycle stage. Scale bars= 5  $\mu$ m. (M) Individual cell in M stage from tissue stained for  
 665 pHH3. Scale bar= 5  $\mu$ m.

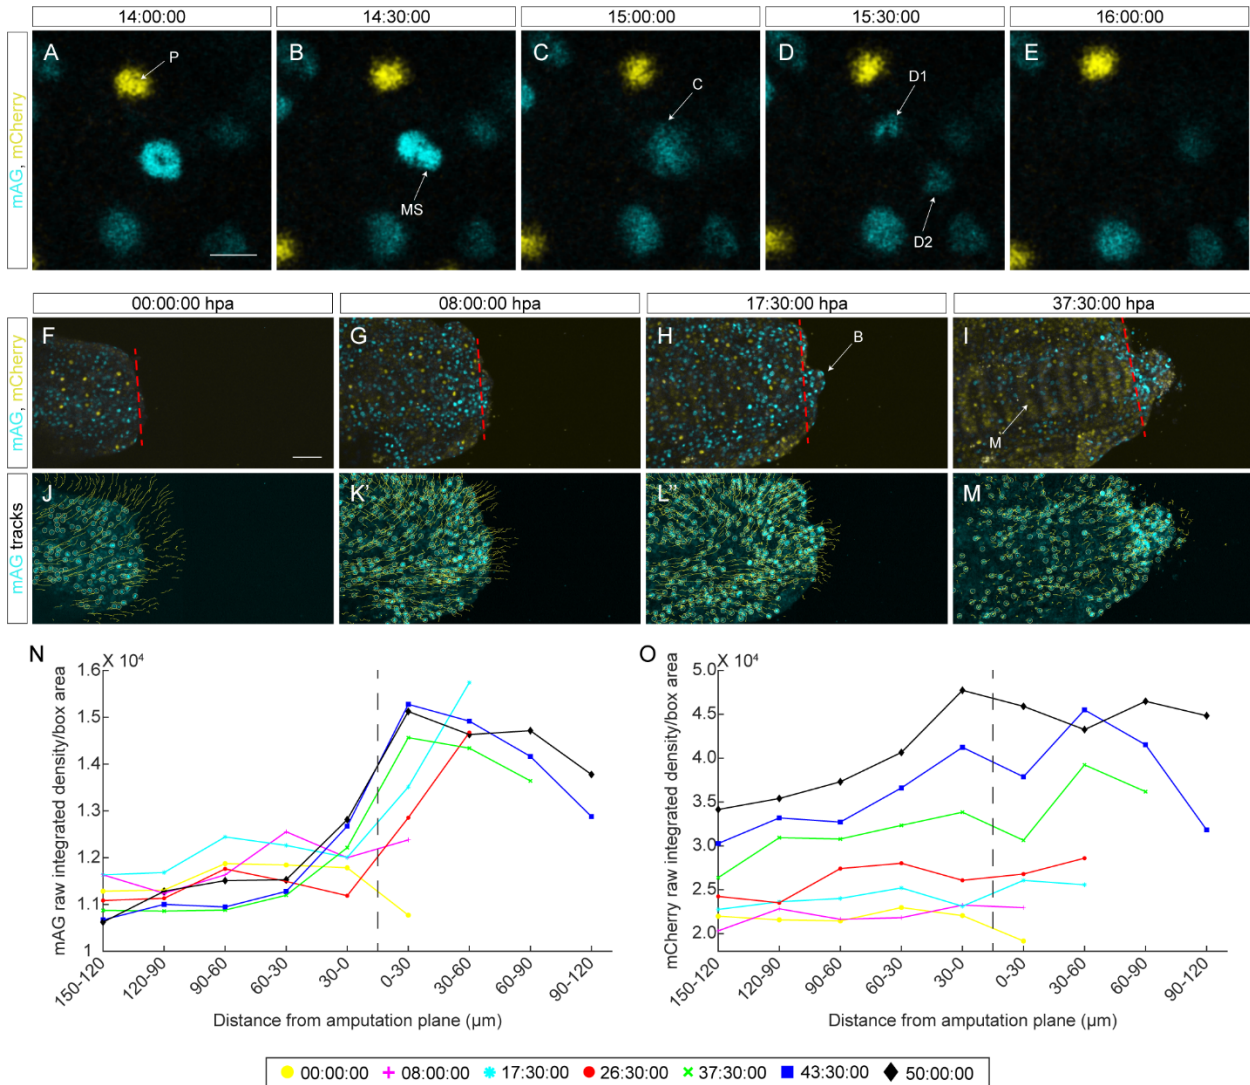

666 **Figure 3: Continuous live imaging of Fucci tissue**

667 (A-E) Two hour time lapse in five, 30 minute intervals of a diving epithelial cell from a  
 668 stage 32 larva. P= pigment cell. MS= mitotic spindle. C= cytokinesis. D1= daughter cell  
 669 1. D2= daughter cell 2. Scale bar= 25 μm. (F-I) Four frames from the 60 hour live image  
 670 depicting a regenerating tail after amputation (F), after wound healing (G), during  
 671 blastema formation (H), and during blastema growth (I). B= blastema. M= myomeres.  
 672 Scale bar= 50 μm. (J-M) Tracks depicting cell migration in the frames from (J-M). Each  
 673 line represents the path a cell took 20 frames prior to the current frame and 20 frames  
 674 after. (N-O) Charts depicting mAG raw integrated density/area (N) or mCherry raw  
 675 integrated density/area (O) for seven frames from the 60 hour live image.  
 676 Measurements were obtained by dividing the anteroposterior axis of the regenerating

677 tail into boxes with a width of 30  $\mu\text{m}$  (Fig. S3). The vertical dotted line represents the  
678 amputation plane.



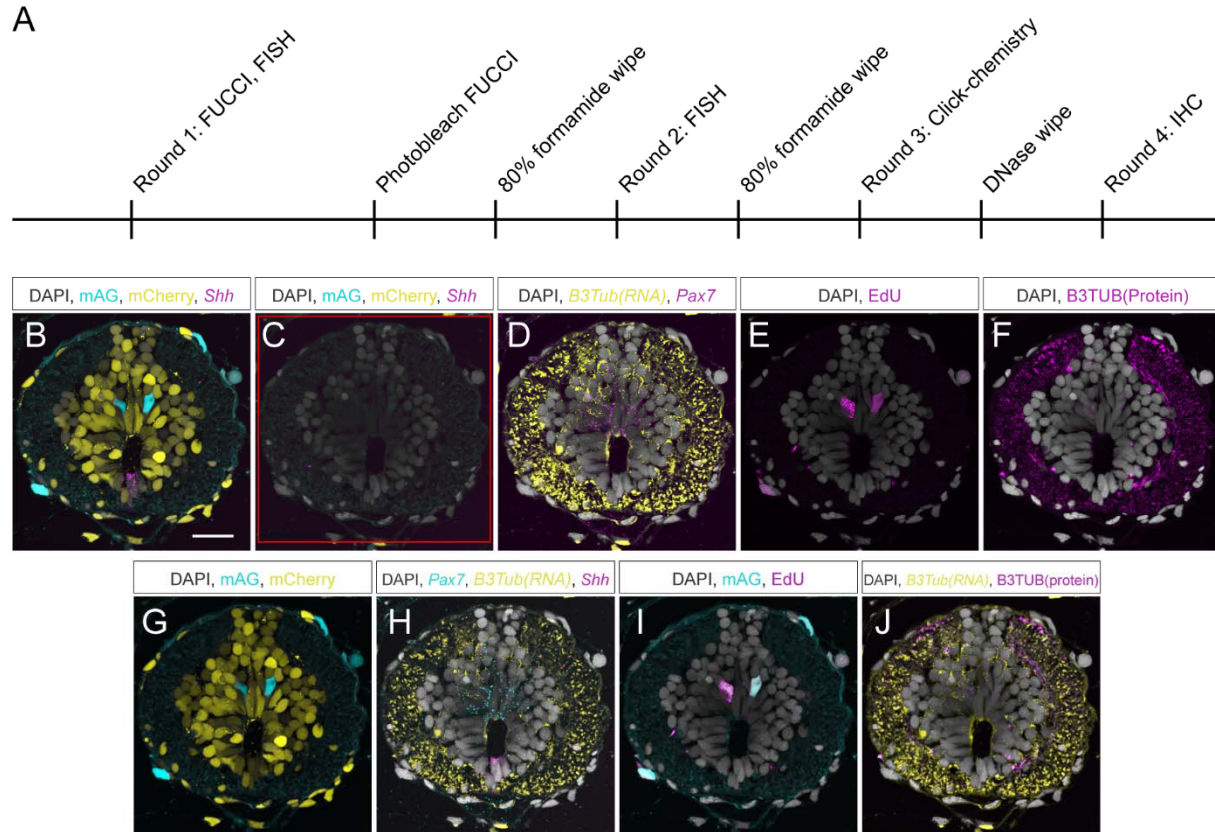

679 **Figure 4: Multimodal imaging of FUCCI tissue for cell type characterization and**  
 680 **identification of cycling cells**

681 (A) Schematic of the staining timeline used for multimodal imaging in a homeostatic  
 682 spinal cord. (B) Round one of imaging for endogenous FUCCI signal and *Shh* transcript  
 683 with V3.HCR-FISH. Scale bar= 50  $\mu$ m. (C) Round one of imaging after photobleaching.  
 684 Red square in image represents the area photobleached. (D) Round two of imaging for  
 685 *Pax7* and *B3Tub* transcript with V3.HCR-FISH. Intense signal in the white matter is  
 686 autofluorescence. (E) Round three of imaging for EdU labeled cells with click-chemistry.  
 687 (F) Round four of imaging for B3TUB protein with IHC. (G) Endogenous FUCCI signal in  
 688 the spinal cord. (H) *Pax7*, *B3Tub* transcript, and *Shh* V3.HCR-FISH signal from rounds  
 689 one and two. (I) mAG expression and EdU labeling from rounds one and three. (J)  
 690 *B3Tub* transcript and B3TUB protein from rounds two and four. DAPI image used for  
 691 panels B-J was obtained in round one.

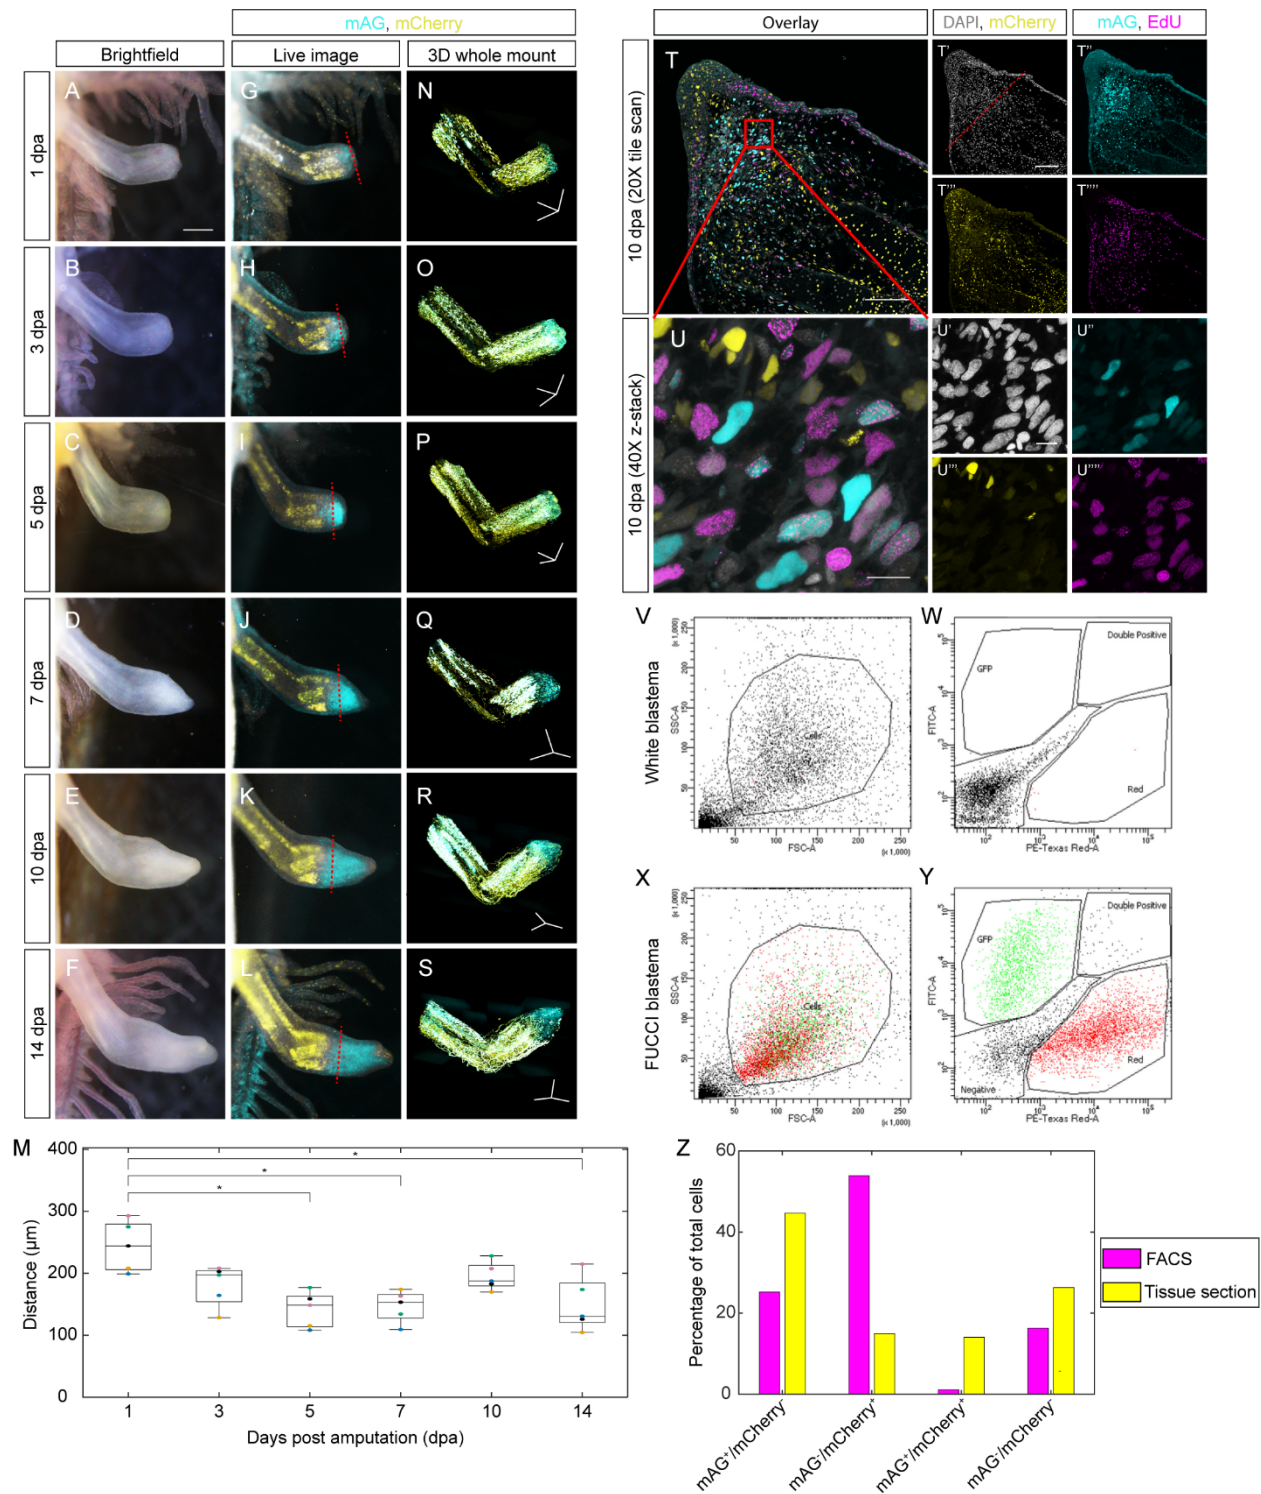

692 **Figure 5: Fucci visualization and quantification during limb regeneration**  
 693 (A-F) Brightfield image of a regenerating Fucci limb amputated through the wrist at 1,  
 694 3, 5, 7, 10, and 14 dpa. Scale bar= 0.5 mm. (G-L) mAG and mCherry fluorescence of  
 695 limbs from panels A-F. (M) Quantification of the distance mAG fluorescence is observed



696 from the amputation plane to the mCherry<sup>+</sup> muscle line at each time point. Each dot  
697 color represents a replicate from a different animal. \*= p value less than 0.05. (N-S) 3D,  
698 whole mount image of FUCCI limbs taken with light sheet fluorescence microscopy.  
699 Scale bars= 600 μm in each axis. (T-T''') 20X tile scan of a 10 dpa FUCCI blastema  
700 pulsed with EdU for three hours. Scale bars= 150 μm. (U-U''') 40X z-stack of the EdU  
701 pulsed blastema mesenchyme. Scale bars= 25 μm. (V-Y) Flow cytometry analysis of  
702 blastema cells from white strain (V-W) and FUCCI (X-Y) axolotls. A forward scatter  
703 (FSC-A) and side scatter (SSC-A) plot was used to gate for the cell population (V, X).  
704 Stage of cell cycle was determined using a PE-Texas Red versus FITC scatter plot  
705 displaying only the gated cell population (W, Y). (Z) Quantification of mAG<sup>+</sup>/mCherry<sup>-</sup>,  
706 mAG<sup>-</sup>/mCherry<sup>+</sup>, mAG<sup>+</sup>/mCherry<sup>+</sup>, and mAG<sup>-</sup>/mCherry<sup>-</sup> cell populations in FACS sorted  
707 blastemas and tissue sections.

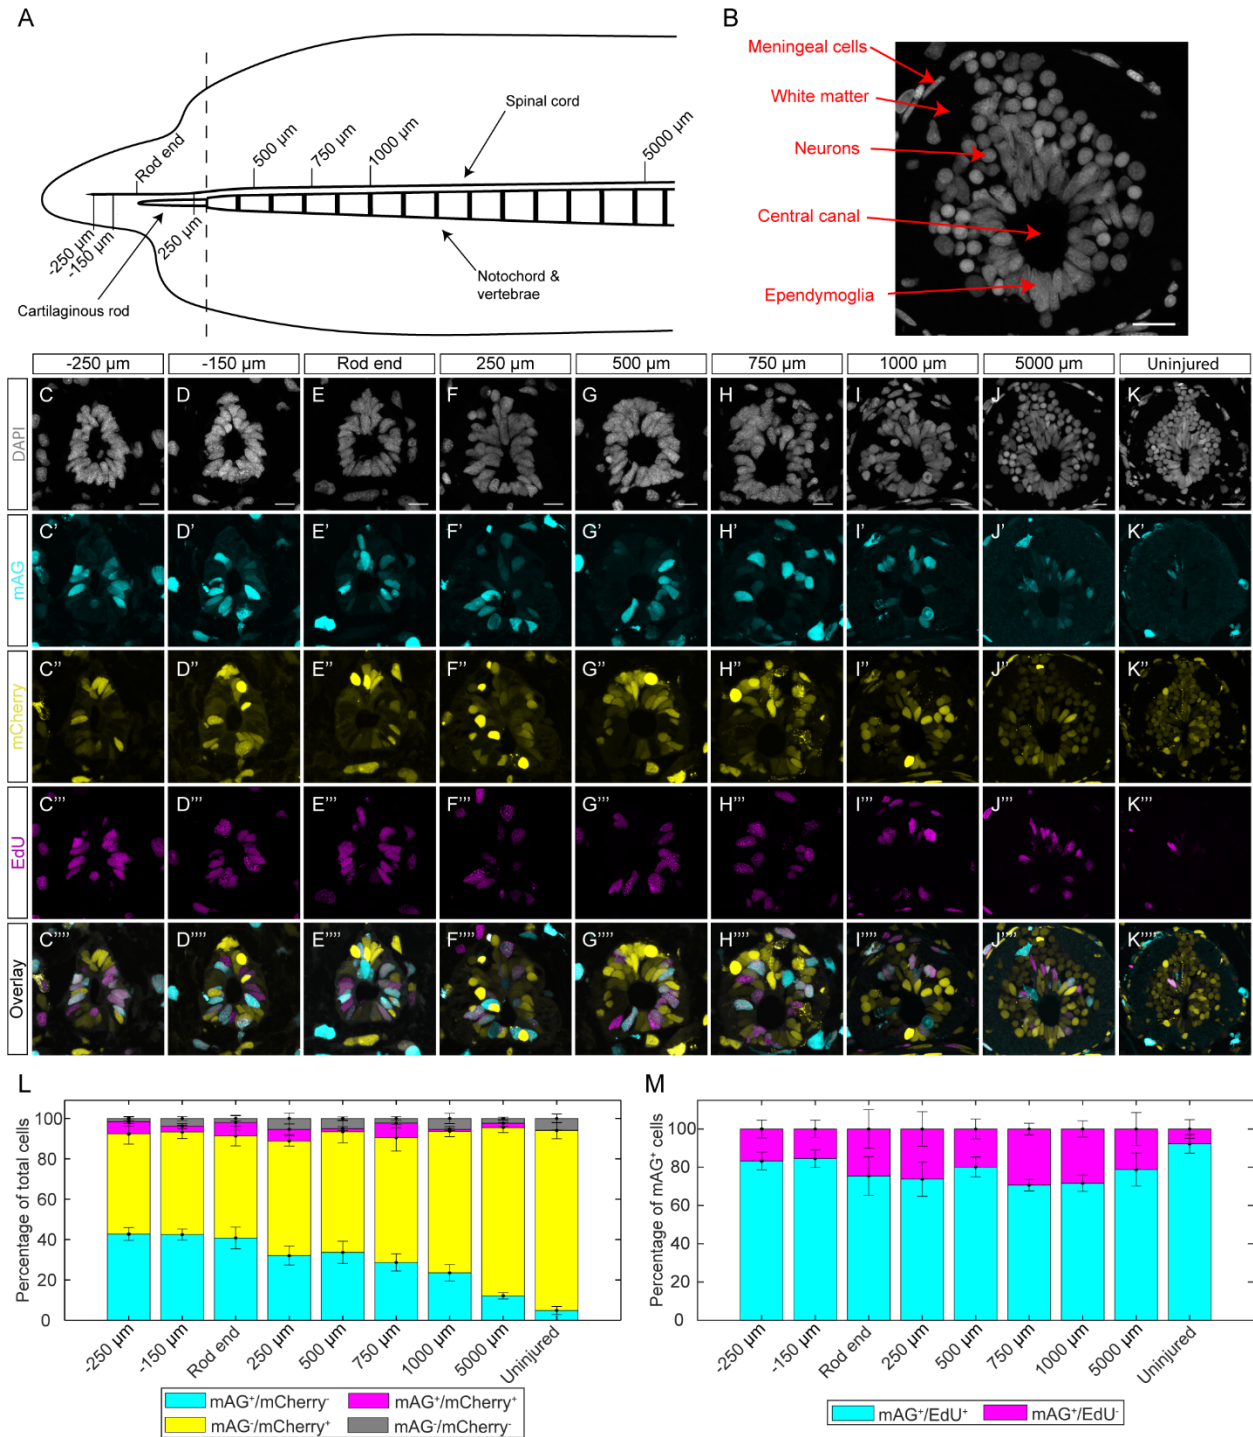

708 **Figure 6: Spinal cord amputation induces a proliferative response 5 mm from the**  
 709 **amputation plane**

710 (A) Schematic of the experiment. (B) Cell types of the spinal cord. Scale bar= 25 μm.

711 (C-K) Individual channels for spinal cord cross sections pulsed with EdU. Scale bars for

712 panels C-J= 25 μm. Scale bar for panel K= 50 μm. (L) Total cell quantification across

713 the regenerating AP axis. (M) mAG<sup>+</sup> cell characterization across the regenerating AP  
714 axis.

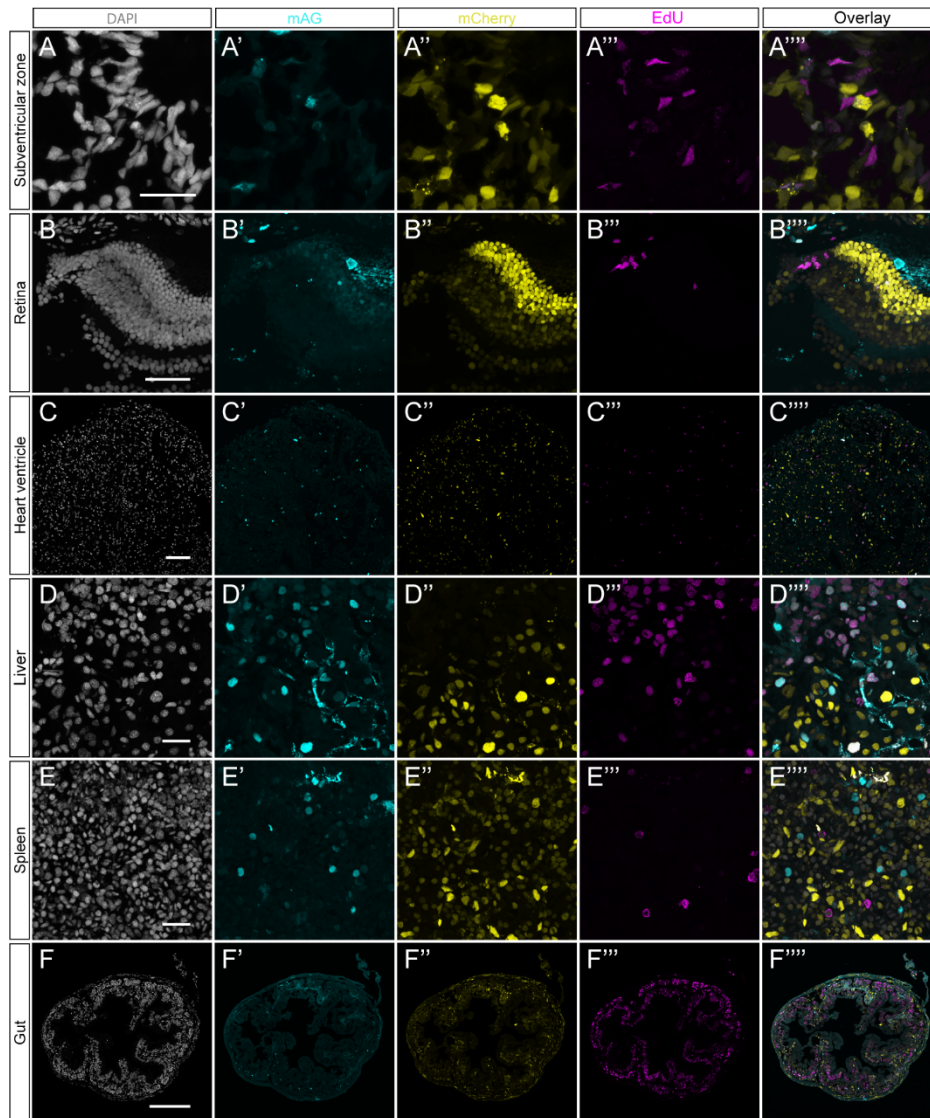

715 **Figure S1: Single channel images from Figure 1**

716 (A-F''') Individual channels from panels I-J in Fig. 1 with EdU staining. Scale bars are

717 identical as in Fig. 1.

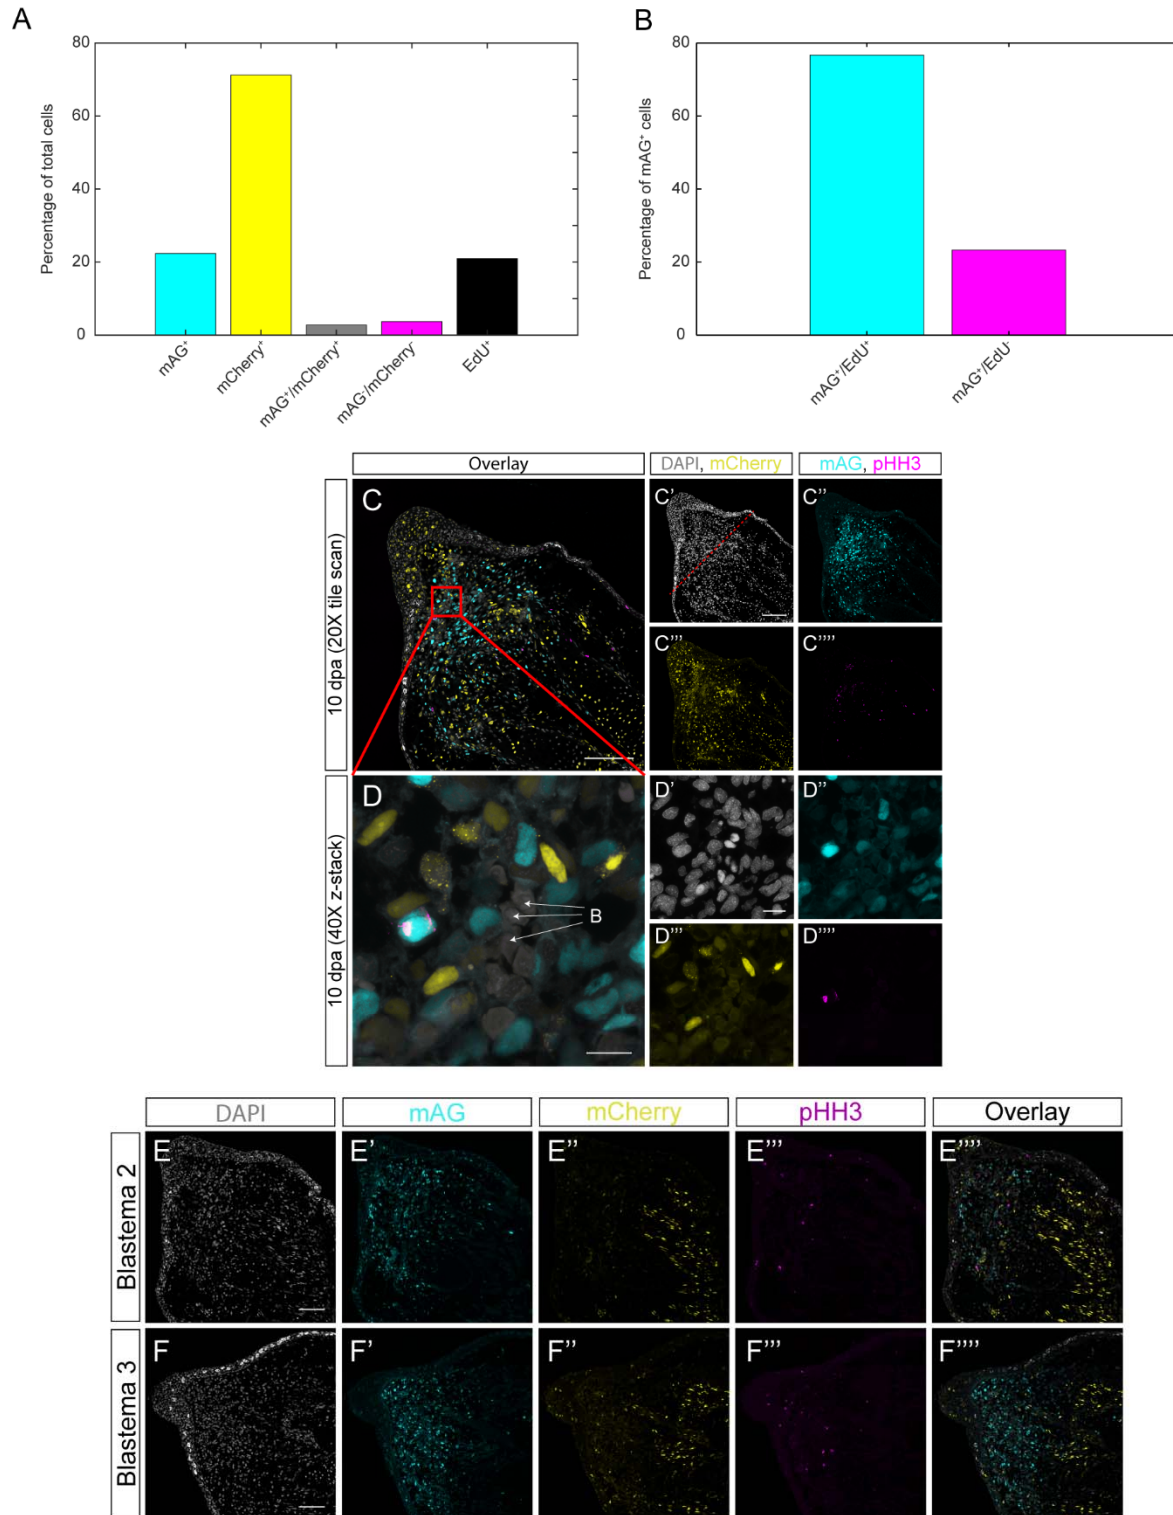

718 **Figure S2: Additional information from FUCCI validation**

719 (A) Total cell characterization of the 2547 cells from the EdU pulsed 14 dpa

720 regenerating spinal cords. (B) Quantification of the number of mAG<sup>+</sup>/EdU<sup>+</sup> and

721 mAG<sup>+</sup>/EdU<sup>-</sup> cells from the EdU pulsed 14 dpa regenerating spinal cords. (C-C''') 20X  
722 tile scan of a 10 dpa FUCCI blastema stained with pHH3. Scale bars= 150 μm. (D-D''')  
723 40X z-stack of pHH3 stained blastema mesenchyme. B= blood cells. Scale bars= 25  
724 μm. (E-F) Two additional replicates of 10 dpa FUCCI limb blastemas stained for pHH3.  
725 Scale bars= 100 μm.



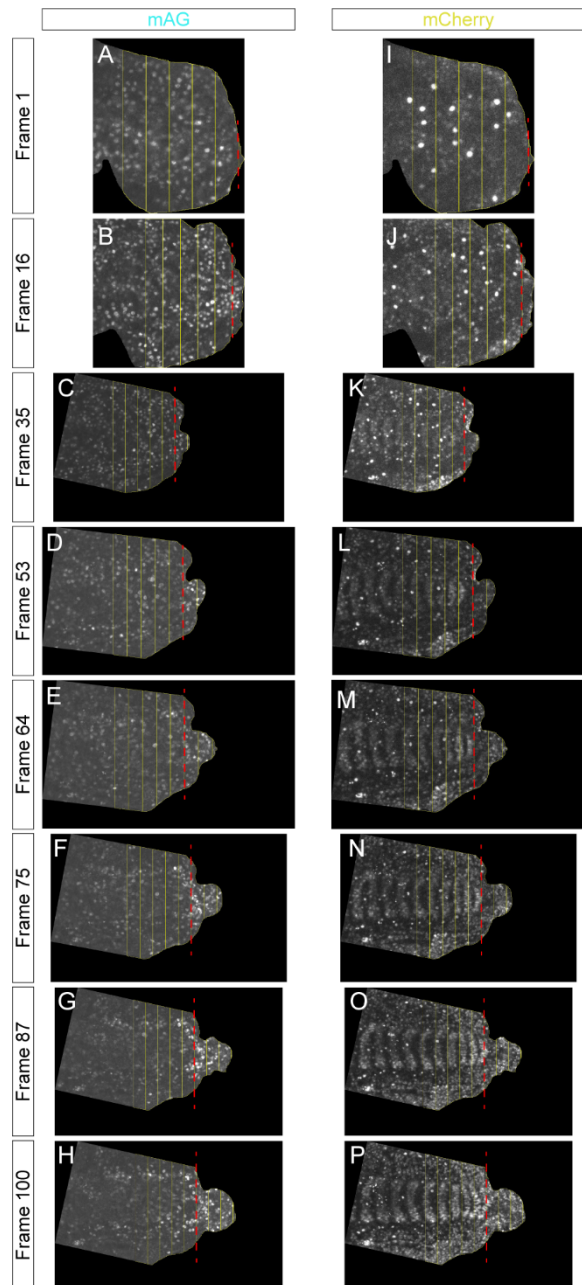

726 **Figure S3: Tail regeneration live image quantification boxes**

727 (A-H) Frames with quantification boxes for mAG. (I-P) Frames with quantification boxes  
728 for mCherry. Red dashed line indicates amputation plane on each frame. Raw  
729 integrated density was measured for each box and divided by total box area.

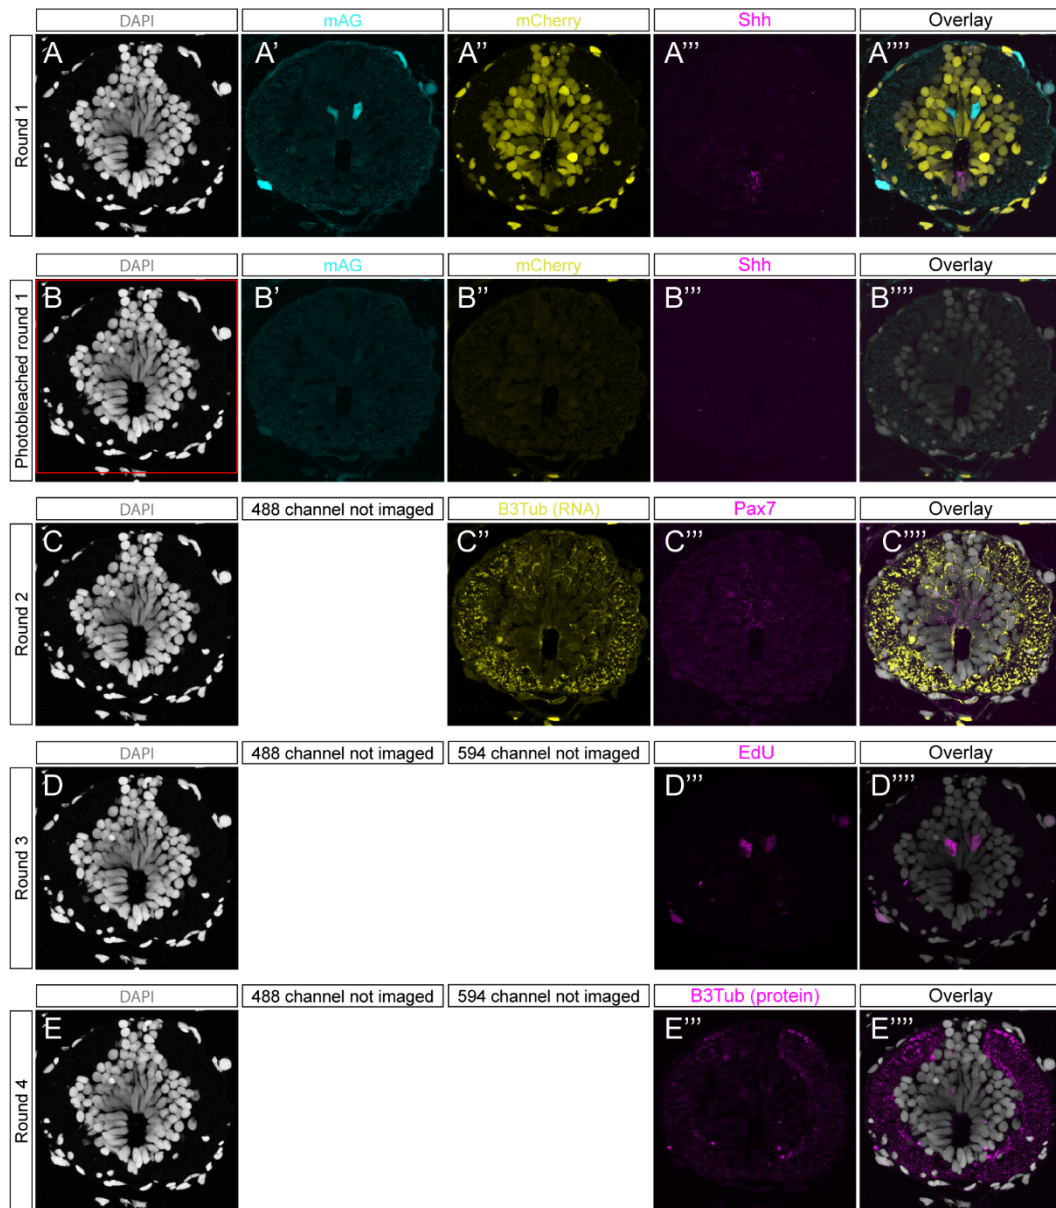

730 **Figure S4: Single channel images from Figure 4**

731 (A-E''') Individual channels from each round of multimodal imaging.



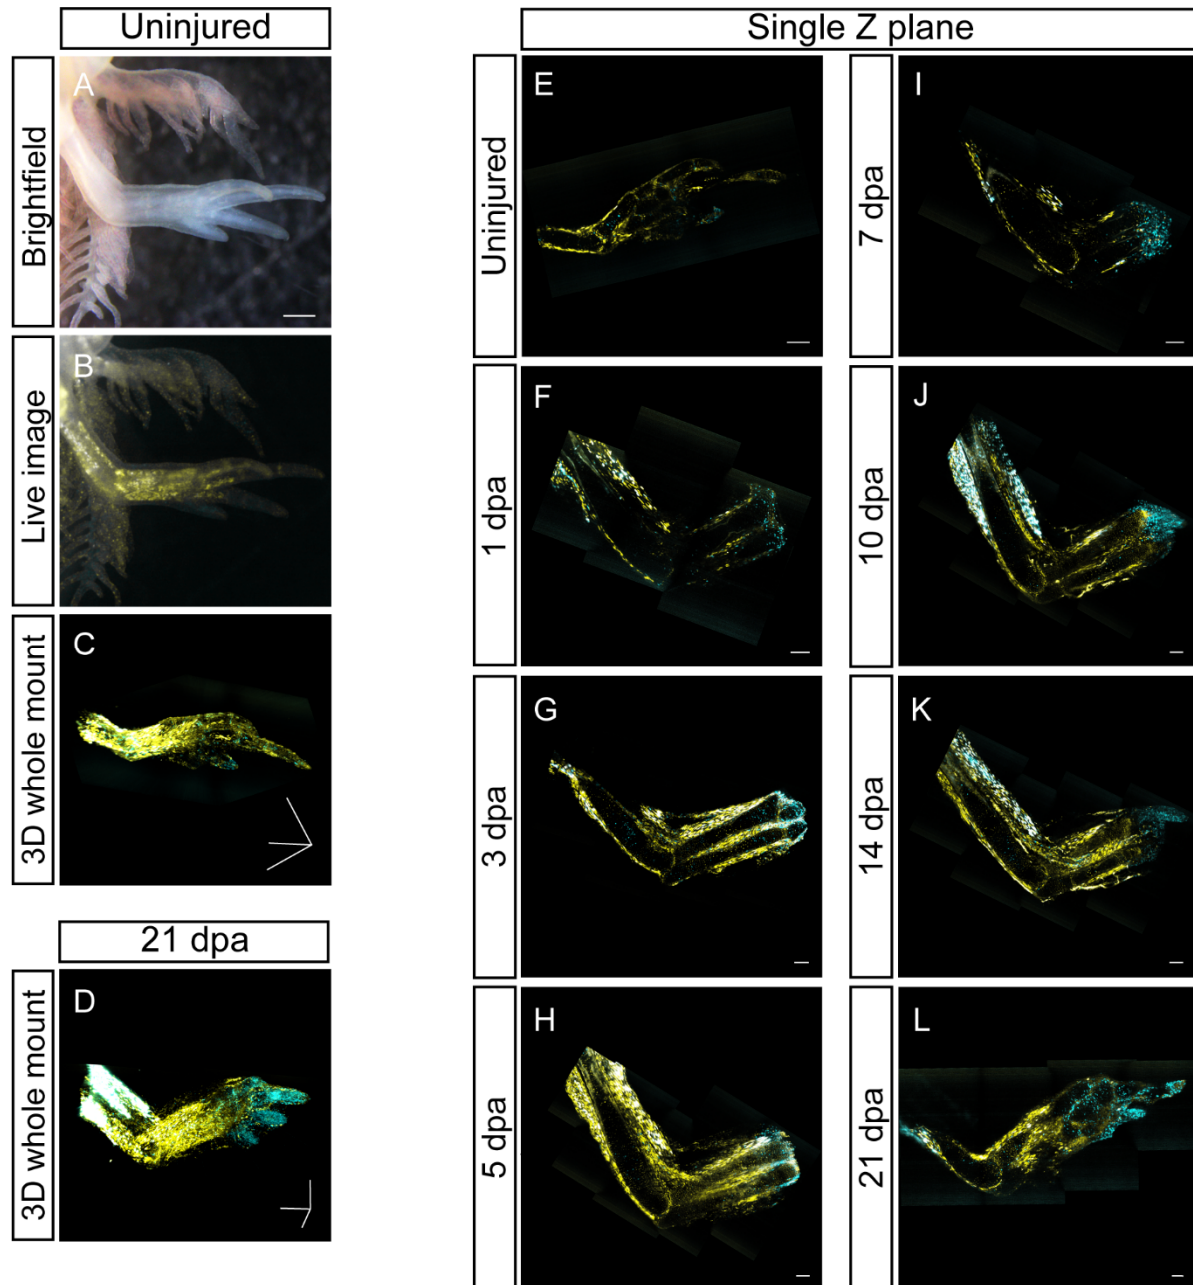

732 **Figure S5: Additional Fucci limb regeneration information**

733 (A) Brightfield image of an uninjured Fucci limb. Scale bar= 0.5 mm. (B) mAG and  
 734 mCherry fluorescence of limb from panel A. (C-D) 3D, whole mount image of uninjured  
 735 (C) and 21 dpa (D) Fucci limbs taken with light sheet fluorescence microscopy. Scale  
 736 bars= 600  $\mu$ m in each axis. (E-L) 2D z slices of whole mount images from panels C-D  
 737 and Figure 5 panels N-S. Scale bars= 200  $\mu$ m.

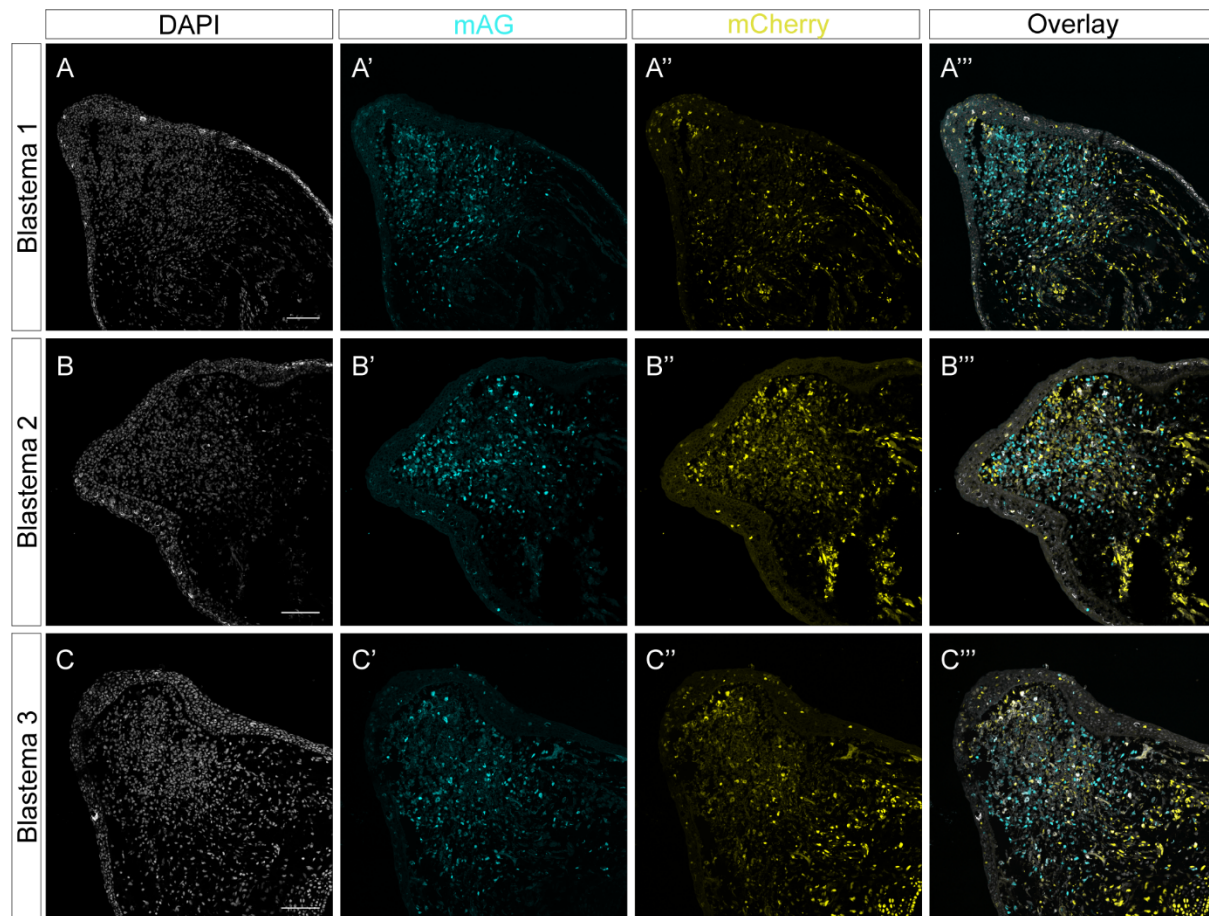

738 **Figure S6: 14 dpa regenerating FUCCI limbs**

739 (A-C''') Single color channels for three replicates of 14 dpa FUCCI limbs. Scale bars=

740 100  $\mu$ m.

- 741 **Movie 1: 16 hour live image of dividing epithelial cells in a stage 32 FUCCI larva**
- 742 **Movie 2: Dividing mAG<sup>+</sup> epithelial cell from a stage 32 larva**
- 743 **Movie 3: 60 hour live image of tail regeneration from a stage 36 FUCCI larva**
- 744 **Movie 4: mAG tracks for each frame from Movie 3**
- 745 **Movie 5: Whole mount uninjured FUCCI limb blastema**
- 746 **Movie 6: Whole mount 21 dpa regenerating FUCCI limb blastema**
